# Supplementary material for: Dynamic network coding of working-memory domains and working-memory processes
Source: PubMed Central journal article supplement (PMC6389921; doi:10.1038/s41467-019-08840-8), 2019-02-25
Supplement: 41467_2019_8840_MOESM1_ESM.pdf [file 41467_2019_8840_MOESM1_ESM.pdf]

---

# DYNAMIC NETWORK CODING OF WORKING-MEMORY DOMAINS AND WORKING-MEMORY PROCESSES

Soreq et al.

# 1 BEHAVIORAL RESULTS

## 1.1 STUDY 1 ACCURACY

In Study 1, Accuracy (see Supplementary Table 1 and Supplementary Figure 1) was examined using a 3 x 3 (domain x load) repeated-measures ANOVA (see Supplementary Table 2). Mean accuracy was 91.13%±6.31SDs. There was a significant effect of load ( $F_{2,36} = 11.85, p < 0.001$ ) with significantly lower accuracy during high compared to both low ( $t = -4.859, p < 0.001$ ) and medium load ( $t = -3.03, p < 0.018$ ). There was no significant main effect of domain ( $F_{2,36} = 2.667, p < 0.085$ ) and no significant interaction between load and domain ( $F_{4,72} = 1.98, p > 0.1$ ).

| Load | Domain   | meanACC | stdACC |
|------|----------|---------|--------|
| Low  | Number   | 0.9474  | 0.0971 |
| Low  | Fractal  | 0.9562  | 0.0755 |
| Low  | Position | 0.9386  | 0.0996 |
| Med  | Number   | 0.9737  | 0.0625 |
| Med  | Fractal  | 0.8860  | 0.1476 |
| Med  | Position | 0.9474  | 0.1929 |
| High | Number   | 0.8158  | 0.2351 |
| High | Fractal  | 0.7983  | 0.2122 |
| High | Position | 0.9386  | 0.1140 |

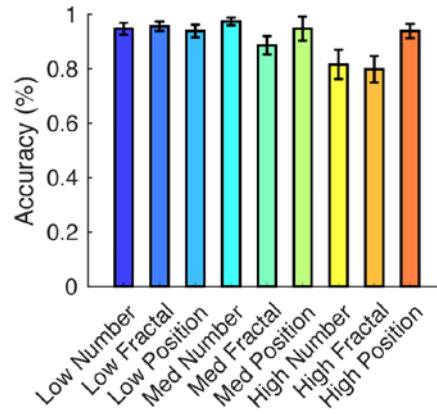

SUPPLEMENTARY TABLE 1

Study 1 summary statistics a 3 x 3 (domain x load) Design

SUPPLEMENTARY FIGURE 1

Study 1 accuracy measures by experimental factors

| Terms                   | SumSq     | DF | MeanSq    | F         | pValueGG |
|-------------------------|-----------|----|-----------|-----------|----------|
| (Intercept)             | 5112.4270 | 1  | 5112.4270 | 3959.7509 | 0.0001   |
| Error                   | 23.2398   | 18 | 1.2911    | 1.0000    | 0.5000   |
| (Intercept):Load        | 11.3802   | 2  | 5.6901    | 11.8498   | 0.0010   |
| Error(Load)             | 17.2866   | 36 | 0.4802    | 1.0000    | 0.5000   |
| (Intercept):Domain      | 3.8714    | 2  | 1.9357    | 2.6670    | 0.0926   |
| Error(Domain)           | 26.1287   | 36 | 0.7258    | 1.0000    | 0.5000   |
| (Intercept):Load:Domain | 7.0059    | 4  | 1.7515    | 1.9809    | 0.1346   |
| Error(Load:Domain)      | 63.6609   | 72 | 0.8842    | 1.0000    | 0.5000   |

SUPPLEMENTARY TABLE 2

Accuracy was examined using a 3 x 3 (domain x load) repeated-measures ANOVA There was a significant main effect of load ( $F_{2,36} = 11.85, p_{GG} < 0.0001$ ) There was no significant main effect of domain and no significant interaction between load and domain ( $F_{2,36} = 2.667, p = 0.083; F_{4,72} = 1.7515, p = 0.106$ )

## 1.2 STUDY 1 REACTION TIME

Median reaction times (RT) (correct trials only) were  $3.637s \pm 1.54SDs$ . Reaction time (RT) effects were examined using repeated-measures ANOVA. Main effects for RT were found for both load and domain ( $F_{2,36} = 168.59, p < 0.0001$ ;  $F_{2,36} = 24.5, p < 0.0001$ ), as well as an interaction effect for domain by load ( $F_{4,72} = 4.508, p < 0.005$ ). Post-hoc tests revealed that RTs increased as a function of load ( $t_{low<med} = -10.7, p < 0.0001$ ;  $t_{low<high} = -16.3, p < 0.0001$ ). And both fractal and number trials were slower than location trial (location  $\neq$  number ( $t_{location<number} = 5.38, p < 0.001$ ;  $t_{location<fractal} = 5.88, p < 0.001$ ). Together, these results demonstrate that the participants understood and could perform the task accurately and that they exhibited the expected costs of load on performance.

| Terms         | Load | Stimulus | meanLogRT | stdLogRT |
|---------------|------|----------|-----------|----------|
| Low Number    | Low  | Number   | 8.0749    | 0.1591   |
| Low Fractal   | Low  | Fractal  | 8.0810    | 0.1905   |
| Low Position  | Low  | Position | 7.9074    | 0.2087   |
| Med Number    | Med  | Number   | 8.3459    | 0.1555   |
| Med Fractal   | Med  | Fractal  | 8.3780    | 0.1811   |
| Med Position  | Med  | Position | 8.0788    | 0.2242   |
| High Number   | High | Number   | 8.5894    | 0.1627   |
| High Fractal  | High | Fractal  | 8.5699    | 0.1639   |
| High Position | High | Position | 8.2701    | 0.2212   |

SUPPLEMENTARY TABLE 3

Study 2 summary statistics for RT with a 3 x 3 (domain x load) Design

| Terms                     | SumSq      | DF | MeanSq     | F          | pValue |
|---------------------------|------------|----|------------|------------|--------|
| (Intercept)               | 11652.7861 | 1  | 11652.7861 | 83286.7815 | 0.0001 |
| Error                     | 2.5185     | 18 | 0.1400     | 1.0000     | 0.5000 |
| (Intercept):Load          | 5.9230     | 2  | 2.9615     | 176.8586   | 0.0001 |
| Error(Load)               | 0.6029     | 36 | 0.0168     | 1.0000     | 0.5000 |
| (Intercept):Stimulus      | 2.4611     | 2  | 1.2306     | 31.4765    | 0.0001 |
| Error(Stimulus)           | 1.4074     | 36 | 0.0391     | 1.0000     | 0.5000 |
| (Intercept):Load:Stimulus | 0.1508     | 4  | 0.0377     | 2.3938     | 0.0584 |
| Error(Load:Stimulus)      | 1.1335     | 72 | 0.0158     | 1.0000     | 0.5000 |

SUPPLEMENTARY TABLE 4

Reaction time was examined using a 3 x 3 (domain x load) repeated-measures ANOVA There was a significant main effect of load and domain ( $F_{2,36} = 168.59, p < 0.00001$ ;  $F_{2,36} = 24.507, p < 0.00001$ ) There was a significant interaction effect between load and domain ( $F_{4,72} = 4.508, p < 0.005$ )

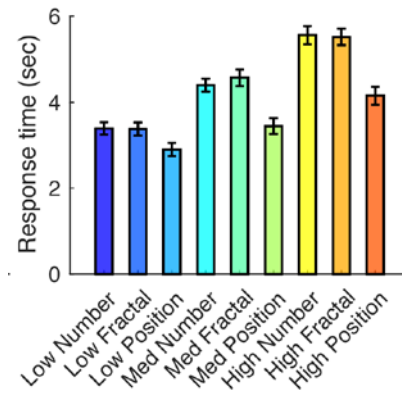

SUPPLEMENTARY FIGURE 2

Study 1 response time measures by experimental factors

### 1.3 STUDY 2 ACCURACY

In Study 2 accuracy (see Supplementary Table 5 and Supplementary Figure 3) was examined using a 2 x 2 x 2 (manipulation x domain x load) repeated- measures ANOVA (see Supplementary Table 6). Mean accuracy was 84.24%  $\pm$  8.5SDs. There was a significant main effect of load ( $F_{1,15} = 43.2, p < 0.0001$ ), and a significant interaction between domain and load ( $F_{1,15} = 5.29, p < 0.04$ ) with accuracy for number trials significantly lower during high-load.

| Load | Stimulus | Manipulation | meanACC | stdACC |
|------|----------|--------------|---------|--------|
| High | Pos      | Off          | 0.8750  | 0.1291 |
| High | Pos      | On           | 0.8230  | 0.1287 |
| High | Num      | Off          | 0.9480  | 0.0798 |
| High | Num      | On           | 0.9063  | 0.0854 |
| Low  | Pos      | Off          | 0.7917  | 0.0746 |
| Low  | Pos      | On           | 0.7813  | 0.0798 |
| Low  | Num      | Off          | 0.7188  | 0.1456 |
| Low  | Num      | On           | 0.7605  | 0.1049 |

**SUPPLEMENTARY TABLE 5**

Study 2 summary statistics a 2 x 2 (domain x load x manipulation) design

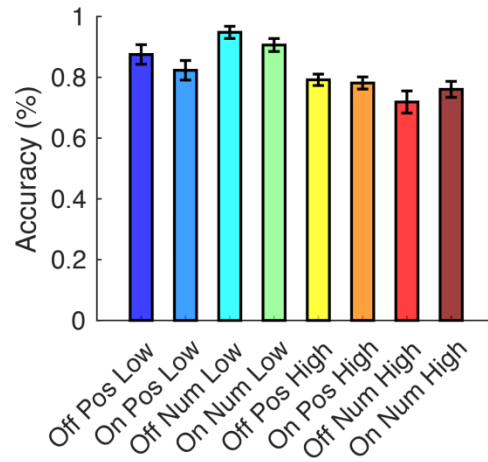

**SUPPLEMENTARY FIGURE 3**

Study 2 accuracy measures by experimental factors

| Terms                                  | SumSq     | DF | MeanSq    | F         | pValueGG |
|----------------------------------------|-----------|----|-----------|-----------|----------|
| (Intercept)                            | 3140.2813 | 1  | 3140.2813 | 5252.0384 | 0.0001   |
| Error                                  | 8.9688    | 15 | 0.5980    | 1.0000    | 0.5000   |
| (Intercept):Load                       | 18.0001   | 1  | 18.0001   | 43.2001   | 0.0001   |
| Error(Load)                            | 6.2500    | 15 | 0.4167    | 1.0000    | 0.5000   |
| (Intercept):Stimulus                   | 0.2813    | 1  | 0.2813    | 1.0630    | 0.3189   |
| Error(Stimulus)                        | 3.9688    | 15 | 0.2646    | 1.0000    | 0.5000   |
| (Intercept):Manipulation               | 0.2813    | 1  | 0.2813    | 1.4211    | 0.2518   |
| Error(Manipulation)                    | 2.9688    | 15 | 0.1980    | 1.0000    | 0.5000   |
| (Intercept):Load:Stimulus              | 4.5000    | 1  | 4.5000    | 5.2942    | 0.0362   |
| Error(Load:Stimulus)                   | 12.7500   | 15 | 0.8500    | 1.0000    | 0.5000   |
| (Intercept):Load:Manipulation          | 1.1251    | 1  | 1.1251    | 2.7552    | 0.1178   |
| Error(Load:Manipulation)               | 6.1250    | 15 | 0.4084    | 1.0000    | 0.5000   |
| (Intercept):Stimulus:Manipulation      | 0.2813    | 1  | 0.2813    | 1.0630    | 0.3189   |
| Error(Stimulus:Manipulation)           | 3.9688    | 15 | 0.2646    | 1.0000    | 0.5000   |
| (Intercept):Load:Stimulus:Manipulation | 0.1250    | 1  | 0.1250    | 0.4546    | 0.5105   |
| Error(Load:Stimulus:Manipulation)      | 4.1250    | 15 | 0.2750    | 1.0000    | 0.5000   |

**SUPPLEMENTARY TABLE 6**

Accuracy was examined using a 2 x 2 X 2 (domain x load x manipulation) repeated-measures ANOVA There was a significant main effect of load ( $F_{1,15} = 31.532, p < 0.00001$ ) There was no significant main effect of domain or manipulation and no significant interactions.

## 1.4 STUDY 2 REACTION TIME

Median reaction times (RT) (correct trials only) were  $3.937s \pm 1.26SDs$ . RTs were examined using a model with the same structure. There was a significant main effect of load and a significant interaction between load and domain ( $F_{1,15} = 74.26$ ,  $p < 0.0001$ ;  $F_{1,15} = 17.05$ ,  $p < 0.001$ ). RTs increased as a function of load ( $t = 8.6$ ,  $p < 0.0001$ ), and RTs for both number and location trials under low load were slower relative to high load ( $t = 9.17$ ,  $p < 0.001$ ;  $t = 4.7$ ,  $p < 0.001$ ). There were no significant effects of manipulation and no other significant interactions. Together, these results show that participants were engaged in the task, exhibited similar effects of load to Study 1, and that participants could successfully manipulate information in working memory.

| Terms        | SumSq  | DF | MeanSq | F | pValueGG |
|--------------|--------|----|--------|---|----------|
| Load         |        |    |        |   |          |
| Stimulus     |        |    |        |   |          |
| Manipulation |        |    |        |   |          |
| meanLogRT    |        |    |        |   |          |
| stdLogRT     |        |    |        |   |          |
| Low Pos Off  | 8.0674 |    |        |   |          |
| Low Pos On   | 8.1237 |    |        |   |          |
| Low Num Off  | 8.0254 |    |        |   |          |
| Low Num On   | 8.0030 |    |        |   |          |
| High Pos Off | 8.3726 |    |        |   |          |
| High Pos On  | 8.2608 |    |        |   |          |
| High Num Off | 8.4601 |    |        |   |          |
| High Num On  | 8.4559 |    |        |   |          |

SUPPLEMENTARY TABLE 7

Study 2 summary statistics for RT with a  $2 \times 2 \times 2$  (domain x load x manipulation) design

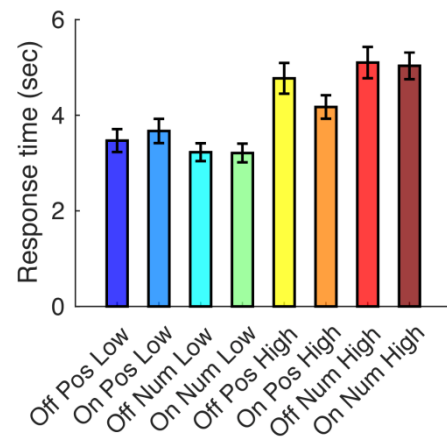

SUPPLEMENTARY FIGURE 4

Study 2 summary statistics for RT with a  $2 \times 2 \times 2$  (domain x load x manipulation) design

|                                        |           |    |           |            |        |
|----------------------------------------|-----------|----|-----------|------------|--------|
| (Intercept)                            | 8650.9647 | 1  | 8650.9647 | 22344.4373 | 0.0001 |
| Error                                  | 5.8075    | 15 | 0.3872    | 1.0000     | 0.5000 |
| (Intercept):Load                       | 3.5372    | 1  | 3.5372    | 120.0365   | 0.0001 |
| Error(Load)                            | 0.4421    | 15 | 0.0295    | 1.0000     | 0.5000 |
| (Intercept):Stimulus                   | 0.0288    | 1  | 0.0288    | 0.8915     | 0.3601 |
| Error(Stimulus)                        | 0.4838    | 15 | 0.0323    | 1.0000     | 0.5000 |
| (Intercept):Manipulation               | 0.0136    | 1  | 0.0136    | 0.7724     | 0.3934 |
| Error(Manipulation)                    | 0.2624    | 15 | 0.0175    | 1.0000     | 0.5000 |
| (Intercept):Load:Stimulus              | 0.3966    | 1  | 0.3966    | 23.4223    | 0.0003 |
| Error(Load:Stimulus)                   | 0.2540    | 15 | 0.0170    | 1.0000     | 0.5000 |
| (Intercept):Load:Manipulation          | 0.0450    | 1  | 0.0450    | 1.6124     | 0.2236 |
| Error(Load:Manipulation)               | 0.4186    | 15 | 0.0280    | 1.0000     | 0.5000 |
| (Intercept):Stimulus:Manipulation      | 0.0017    | 1  | 0.0017    | 0.1439     | 0.7098 |
| Error(Stimulus:Manipulation)           | 0.1760    | 15 | 0.0118    | 1.0000     | 0.5000 |
| (Intercept):Load:Stimulus:Manipulation | 0.0694    | 1  | 0.0694    | 3.0314     | 0.1022 |
| Error(Load:Stimulus:Manipulation)      | 0.3432    | 15 | 0.0229    | 1.0000     | 0.5000 |

SUPPLEMENTARY TABLE 8

Reaction time was examined using a  $2 \times 2 \times 2$  (domain x load x manipulation) repeated-measures ANOVA. There were significant main effect of load and interaction between load and domain ( $F_{1,15} = 74.262$ ,  $p < 0.00001$ ;  $F_{1,15} = 17.049$ ,  $p < 0.001$ ). There were no other significant effects.

## 2 PARCELLATION SETS

### 2.1 STAGE GENERAL ROI SET

| ROIid | Volume | X   | Y   | Z  | hemisphere | lobe      | name WFU | name AAL2          |
|-------|--------|-----|-----|----|------------|-----------|----------|--------------------|
| 1     | 1981   | 2   | 8   | 50 | Right      | Temporal  | BA.32    | Supp Motor Area L  |
| 2     | 1552   | -30 | -8  | 54 | Left       | Temporal  | BA.06    | Precentral L       |
| 3     | 1306   | -46 | 4   | 30 | Left       | Temporal  | BA.09    | Precentral L       |
| 4     | 762    | -20 | -62 | 56 | Left       | Occipital | BA.07    | Parietal Sup L     |
| 5     | 1171   | 30  | -4  | 56 | Right      | Temporal  | BA.06    | Frontal Sup 2 R    |
| 6     | 1733   | -36 | -46 | 46 | Left       | Occipital | BA.40    | Parietal Inf L     |
| 7     | 311    | -12 | -74 | 46 | Left       | Occipital | BA.07    | Parietal Sup L     |
| 8     | 764    | -22 | -70 | 38 | Left       | Temporal  | BA.07    | Parietal Sup L     |
| 9     | 2650   | 26  | -64 | 46 | Right      | Temporal  | BA.07    | Parietal Sup R     |
| 10    | 628    | -24 | -78 | 24 | Left       | Frontal   | BA.19    | Occipital Mid L    |
| 11    | 882    | 50  | 8   | 30 | Right      | Temporal  | BA.09    | Frontal Inf Oper R |
| 12    | 799    | 40  | -42 | 44 | Right      | Temporal  | BA.40    | Parietal Inf R     |
| 13    | 359    | -32 | 18  | 2  | Left       | Cerebelum | BA.13    | Insula L           |
| 14    | 76     | -10 | -4  | 72 | Left       | Frontal   | BA.06    | Supp Motor Area L  |
| 15    | 115    | -48 | 24  | 26 | Left       | Insula    | BA.46    | Frontal Inf Tri L  |
| 16    | 98     | 52  | -28 | 46 | Right      | Frontal   | BA.02    | Postcentral R      |
| 17    | 140    | -10 | -20 | 6  | Left       | Cerebelum | null     | Thalamus L         |
| 18    | 166    | 48  | 28  | 22 | Right      | Temporal  | BA.46    | Frontal Inf Tri R  |
| 19    | 60     | 48  | 20  | 26 | Right      | Occipital | BA.46    | Frontal Inf Tri R  |
| 20    | 138    | 0   | -28 | -4 | Medial     | Cerebelum | null     | Thalamus R         |

SUPPLEMENTARY TABLE 9

Data-drive parcellation set based on Stage general conjunction.

## 2.2 DOMAIN GENERAL ROI SET

| ROIid | Volume | X   | Y   | Z   | hemisphere | lobe      | name WFU | name AAL2          |
|-------|--------|-----|-----|-----|------------|-----------|----------|--------------------|
| 1     | 993    | 28  | -76 | 30  | Right      | Occipital | BA.19    | Occipital Sup R    |
| 2     | 1760   | -20 | -68 | 44  | Left       | Temporal  | BA.07    | Parietal Sup L     |
| 3     | 2090   | 30  | -86 | 8   | Right      | Temporal  | BA.19    | Occipital Mid R    |
| 4     | 2163   | -22 | -90 | 8   | Left       | Temporal  | BA.18    | Occipital Mid L    |
| 5     | 2574   | 2   | 6   | 50  | Right      | Temporal  | BA.06    | Supp Motor Area L  |
| 6     | 518    | -24 | -78 | 24  | Left       | Frontal   | BA.31    | Occipital Mid L    |
| 7     | 2094   | -30 | -16 | 60  | Left       | Temporal  | BA.06    | Precentral L       |
| 8     | 1088   | -46 | 4   | 32  | Left       | Temporal  | BA.09    | Precentral L       |
| 9     | 2375   | 28  | -62 | 48  | Right      | Temporal  | BA.07    | Parietal Sup R     |
| 10    | 1429   | 48  | 14  | 28  | Right      | Temporal  | BA.09    | Frontal Inf Oper R |
| 11    | 3872   | -28 | -70 | -16 | Left       | Cerebelum | BA.19    | Fusiform L         |
| 12    | 1879   | 32  | -54 | -20 | Right      | Cerebelum | BA.37    | Fusiform R         |
| 13    | 2156   | 26  | -76 | -14 | Right      | Cerebelum | BA.18    | Lingual R          |
| 14    | 656    | -26 | -6  | 52  | Left       | Temporal  | BA.06    | Precentral L       |
| 15    | 1126   | 32  | -4  | 56  | Right      | Temporal  | BA.06    | Frontal Sup 2 R    |
| 16    | 1178   | -32 | -50 | 50  | Left       | Temporal  | BA.40    | Parietal Inf L     |
| 17    | 371    | -50 | -26 | 46  | Left       | Temporal  | BA.02    | Postcentral L      |
| 18    | 498    | 46  | -62 | -12 | Right      | Cerebelum | BA.37    | Temporal Inf R     |
| 19    | 704    | -6  | -82 | -6  | Left       | Cerebelum | BA.18    | Lingual L          |
| 20    | 1218   | 8   | -78 | -2  | Right      | Cerebelum | BA.18    | Lingual R          |
| 21    | 839    | -40 | -38 | 48  | Left       | Occipital | BA.40    | Postcentral L      |
| 22    | 737    | 12  | -92 | 6   | Right      | Temporal  | BA.18    | Calcarine R        |
| 23    | 469    | -10 | -22 | 2   | Left       | Cerebelum | BA.27    | Thalamus L         |
| 24    | 389    | -30 | 18  | 2   | Left       | Cerebelum | BA.13    | Insula L           |
| 25    | 333    | 34  | 18  | 4   | Right      | Cerebelum | BA.13    | Insula R           |
| 26    | 267    | -8  | -96 | -2  | Left       | Cerebelum | BA.17    | Calcarine L        |
| 27    | 221    | 12  | -18 | 4   | Right      | Cerebelum | null     | Thalamus R         |
| 28    | 257    | 6   | -28 | -6  | Right      | Cerebelum | null     | Thalamus R         |
| 29    | 199    | -4  | -28 | -8  | Left       | Cerebelum | null     | Thalamus L         |
| 30    | 54     | -48 | -24 | 20  | Left       | Frontal   | BA.13    | Rolandic Oper L    |
| 31    | 112    | 46  | -36 | 44  | Right      | Occipital | BA.40    | SupraMarginal R    |
| 32    | 93     | -44 | 30  | 24  | Left       | Occipital | BA.46    | Frontal Inf Tri L  |
| 33    | 84     | -16 | 4   | 2   | Left       | Cerebelum | null     | Putamen L          |

SUPPLEMENTARY TABLE 10

Data-drive parcellation set based on Domain general conjunction.

## 2.3 WHOLE BRAIN ROI SET

| ROIid | Volume | X  | Y   | Z   | hemisphere | lobe     | name Yeo7         | name AAL2            |
|-------|--------|----|-----|-----|------------|----------|-------------------|----------------------|
| 1     | 625    | 16 | 56  | -18 | Right      | Frontal  | Limbic            | OFCant R             |
| 2     | 426    | 10 | 16  | -20 | Right      | Frontal  | Limbic            | Rectus R             |
| 3     | 521    | 6  | 34  | -18 | Right      | Frontal  | Limbic            | Rectus R             |
| 4     | 301    | 16 | 34  | -24 | Right      | Frontal  | Limbic            | OFCmed R             |
| 5     | 783    | 10 | 46  | -2  | Right      | Frontal  | Default           | Frontal Med Orb R    |
| 6     | 712    | 18 | 64  | 2   | Right      | Frontal  | Default           | Frontal Sup 2 R      |
| 7     | 607    | 32 | 54  | -4  | Right      | Frontal  | Frontoparietal    | Frontal Mid 2 R      |
| 8     | 652    | 46 | 46  | -6  | Right      | Frontal  | Frontoparietal    | Frontal Mid 2 R      |
| 9     | 1001   | 30 | 50  | 18  | Right      | Frontal  | Frontoparietal    | Frontal Sup 2 R      |
| 10    | 925    | 10 | 52  | 22  | Right      | Frontal  | Default           | Frontal Sup Medial R |
| 11    | 792    | 38 | 34  | 30  | Right      | Frontal  | Frontoparietal    | Frontal Mid 2 R      |
| 12    | 1050   | 16 | 36  | 48  | Right      | Frontal  | Default           | Frontal Sup 2 R      |
| 13    | 683    | 26 | 30  | 36  | Right      | Frontal  | Default           | Frontal Sup 2 R      |
| 14    | 747    | 42 | 14  | 48  | Right      | Frontal  | Frontoparietal    | Frontal Mid 2 R      |
| 15    | 622    | 8  | 20  | 30  | Right      | Limbic   | Ventral Attention | Cingulate Mid R      |
| 16    | 947    | 54 | 24  | 0   | Right      | Frontal  | Default           | Frontal Inf Tri R    |
| 17    | 708    | 34 | 36  | -18 | Right      | Frontal  | Frontoparietal    | OFCant R             |
| 18    | 414    | 28 | 18  | -22 | Right      | Frontal  | Limbic            | OFCpost R            |
| 19    | 795    | 50 | 34  | 14  | Right      | Frontal  | Frontoparietal    | Frontal Inf Tri R    |
| 20    | 473    | 38 | 20  | 6   | Right      | Insula   | Ventral Attention | Insula R             |
| 21    | 888    | 56 | 8   | 22  | Right      | Frontal  | Dorsal Attention  | Frontal Inf Oper R   |
| 22    | 580    | 40 | 16  | 28  | Right      | Frontal  | Frontoparietal    | Frontal Inf Oper R   |
| 23    | 930    | 58 | -10 | 26  | Right      | Parietal | Somatomotor       | Postcentral R        |
| 24    | 535    | 8  | -24 | 64  | Right      | Frontal  | Somatomotor       | Supp Motor Area R    |
| 25    | 444    | 8  | -10 | 52  | Right      | Frontal  | Somatomotor       | Supp Motor Area R    |
| 26    | 727    | 28 | -14 | 66  | Right      | Frontal  | Somatomotor       | Precentral R         |
| 27    | 603    | 50 | -6  | 46  | Right      | Frontal  | Somatomotor       | Precentral R         |
| 28    | 474    | 8  | 14  | 48  | Right      | Frontal  | Ventral Attention | Supp Motor Area R    |
| 29    | 903    | 14 | 6   | 64  | Right      | Frontal  | Ventral Attention | Supp Motor Area R    |
| 30    | 597    | 26 | 12  | 48  | Right      | Frontal  | Frontoparietal    | Frontal Sup 2 R      |
| 31    | 432    | 40 | 2   | 34  | Right      | Frontal  | Dorsal Attention  | Precentral R         |
| 32    | 410    | 34 | -6  | 50  | Right      | Frontal  | Dorsal Attention  | Precentral R         |
| 33    | 869    | 42 | -24 | 52  | Right      | Parietal | Somatomotor       | Postcentral R        |
| 34    | 463    | 42 | 4   | -8  | Right      | Insula   | Ventral Attention | Insula R             |
| 35    | 460    | 42 | 2   | 6   | Right      | Insula   | Ventral Attention | Insula R             |
| 36    | 519    | 38 | 20  | -12 | Right      | Insula   | Frontoparietal    | Insula R             |
| 37    | 565    | 40 | -14 | -2  | Right      | Insula   | Somatomotor       | Insula R             |
| 38    | 607    | 34 | -40 | 48  | Right      | Parietal | Dorsal Attention  | Postcentral R        |
| 39    | 838    | 22 | -34 | 68  | Right      | Parietal | Somatomotor       | Postcentral R        |
| 40    | 480    | 44 | -12 | 12  | Right      | Frontal  | Somatomotor       | Rolandic Oper R      |



| ROIid | Volume | X  | Y   | Z   | hemisphere | lobe      | name Yeo7         | name AAL2           |
|-------|--------|----|-----|-----|------------|-----------|-------------------|---------------------|
| 41    | 836    | 26 | -56 | 66  | Right      | Parietal  | Dorsal Attention  | Parietal Sup R      |
| 42    | 562    | 16 | -70 | 34  | Right      | Parietal  | Frontoparietal    | Precuneus R         |
| 43    | 1457   | 32 | -62 | 48  | Right      | Parietal  | Dorsal Attention  | Parietal Sup R      |
| 44    | 1001   | 8  | -58 | 58  | Right      | Parietal  | Dorsal Attention  | Precuneus R         |
| 45    | 1222   | 54 | -28 | 40  | Right      | Parietal  | Dorsal Attention  | SupraMarginal R     |
| 46    | 949    | 58 | -30 | 18  | Right      | Temporal  | Ventral Attention | Temporal Sup R      |
| 47    | 1180   | 56 | -46 | 36  | Right      | Parietal  | Frontoparietal    | SupraMarginal R     |
| 48    | 965    | 48 | -62 | 34  | Right      | Parietal  | Default           | Angular R           |
| 49    | 780    | 42 | -76 | 26  | Right      | Occipital | Dorsal Attention  | Occipital Mid R     |
| 50    | 752    | 50 | -60 | 14  | Right      | Temporal  | Dorsal Attention  | Temporal Mid R      |
| 51    | 389    | 28 | 10  | -42 | Right      | Temporal  | Limbic            | Temporal Pole Mid R |
| 52    | 507    | 42 | 18  | -36 | Right      | Temporal  | Limbic            | Temporal Pole Mid R |
| 53    | 857    | 54 | 10  | -22 | Right      | Temporal  | Default           | Temporal Pole Sup R |
| 54    | 339    | 52 | -34 | -2  | Right      | Temporal  | Default           | Temporal Mid R      |
| 55    | 690    | 62 | -24 | -24 | Right      | Temporal  | Default           | Temporal Inf R      |
| 56    | 488    | 56 | -8  | -32 | Right      | Temporal  | Default           | Temporal Inf R      |
| 57    | 467    | 48 | 2   | -40 | Right      | Temporal  | Limbic            | Temporal Inf R      |
| 58    | 421    | 42 | -12 | -36 | Right      | Occipital | Limbic            | Fusiform R          |
| 59    | 392    | 44 | -28 | -26 | Right      | Occipital | Limbic            | Fusiform R          |
| 60    | 388    | 32 | 0   | -46 | Right      | Occipital | Limbic            | Fusiform R          |
| 61    | 1033   | 60 | -4  | 2   | Right      | Temporal  | Somatomotor       | Temporal Sup R      |
| 62    | 511    | 40 | -26 | 14  | Right      | Frontal   | Somatomotor       | Rolandic Oper R     |
| 63    | 816    | 62 | -24 | -4  | Right      | Temporal  | Somatomotor       | Temporal Sup R      |
| 64    | 757    | 58 | -10 | -16 | Right      | Temporal  | Default           | Temporal Mid R      |
| 65    | 961    | 60 | -44 | 8   | Right      | Temporal  | Ventral Attention | Temporal Mid R      |
| 66    | 444    | 48 | -60 | -16 | Right      | Temporal  | Visual            | Temporal Inf R      |
| 67    | 577    | 38 | -70 | -18 | Right      | Occipital | Visual            | Fusiform R          |
| 68    | 622    | 26 | -46 | -14 | Right      | Occipital | Visual            | Fusiform R          |
| 69    | 688    | 56 | -58 | -6  | Right      | Temporal  | Dorsal Attention  | Temporal Mid R      |
| 70    | 974    | 62 | -44 | -18 | Right      | Temporal  | Frontoparietal    | Temporal Inf R      |
| 71    | 610    | 42 | -46 | -24 | Right      | Occipital | Visual            | Fusiform R          |
| 72    | 635    | 22 | -64 | -10 | Right      | Occipital | Visual            | Lingual R           |
| 73    | 624    | 32 | -84 | 20  | Right      | Occipital | Visual            | Occipital Mid R     |
| 74    | 829    | 46 | -76 | 2   | Right      | Occipital | Visual            | Occipital Mid R     |
| 75    | 874    | 20 | -82 | 38  | Right      | Occipital | Visual            | Occipital Sup R     |
| 76    | 761    | 20 | -84 | -12 | Right      | Occipital | Visual            | Lingual R           |
| 77    | 521    | 12 | -76 | 24  | Right      | Occipital | Visual            | Cuneus R            |
| 78    | 691    | 24 | -96 | 6   | Right      | Occipital | Visual            | Occipital Mid R     |
| 79    | 462    | 8  | -76 | -4  | Right      | Occipital | Visual            | Lingual R           |
| 80    | 696    | 10 | -90 | 10  | Right      | Occipital | Visual            | Calcarine R         |
| 81    | 649    | 32 | -92 | -12 | Right      | Occipital | Visual            | Occipital Inf R     |

| ROIid | Volume | X  | Y   | Z   | hemisphere | lobe          | name Yeo7         | name AAL2          |
|-------|--------|----|-----|-----|------------|---------------|-------------------|--------------------|
| 82    | 650    | 16 | -70 | 8   | Right      | Occipital     | Visual            | Calcarine R        |
| 83    | 576    | 10 | 34  | 16  | Right      | Limbic        | Default           | Cingulate Ant R    |
| 84    | 362    | 6  | -2  | 34  | Right      | Limbic        | Ventral Attention | Cingulate Mid R    |
| 85    | 394    | 6  | -40 | 26  | Right      | Limbic        | Default           | Cingulate Post R   |
| 86    | 612    | 14 | -58 | 18  | Right      | Parietal      | Default           | Precuneus R        |
| 87    | 273    | 30 | -54 | 6   | Right      | Occipital     | Visual            | Calcarine R        |
| 88    | 259    | 8  | -20 | 30  | Right      | Limbic        | Frontoparietal    | Cingulate Mid R    |
| 89    | 420    | 10 | -24 | 44  | Right      | Limbic        | Somatomotor       | Cingulate Mid R    |
| 90    | 685    | 8  | -58 | 38  | Right      | Parietal      | Default           | Precuneus R        |
| 91    | 545    | 10 | -40 | 48  | Right      | Parietal      | Ventral Attention | Precuneus R        |
| 92    | 444    | 32 | 2   | -22 | Right      | Limbic        | Limbic            | Amygdala R         |
| 93    | 334    | 30 | -38 | -2  | Right      | Limbic        | Visual            | Hippocampus R      |
| 94    | 295    | 36 | -16 | -20 | Right      | Limbic        | Limbic            | Hippocampus R      |
| 95    | 558    | 30 | -30 | -14 | Right      | Limbic        | Visual            | ParaHippocampal R  |
| 96    | 364    | 30 | -20 | -28 | Right      | Limbic        | Limbic            | ParaHippocampal R  |
| 97    | 377    | 26 | -4  | -32 | Right      | Limbic        | Limbic            | ParaHippocampal R  |
| 98    | 631    | 16 | -48 | 2   | Right      | Occipital     | Visual            | Lingual R          |
| 99    | 621    | 20 | -8  | -16 | Right      | Limbic        | Limbic            | Hippocampus R      |
| 100   | 684    | 34 | -80 | -42 | Right      | Cerebellum    | Default           | Cerebellum Crus2 R |
| 101   | 621    | 8  | -52 | -14 | Right      | Cerebellum    | Somatomotor       | Vermis 4 5         |
| 102   | 962    | 40 | -76 | -30 | Right      | Cerebellum    | Default           | Cerebellum Crus1 R |
| 103   | 442    | 14 | -42 | -26 | Right      | Cerebellum    | Limbic            | Cerebellum 4 5 R   |
| 104   | 207    | 24 | -36 | -44 | Right      | Cerebellum    | Limbic            | Cerebellum 10 R    |
| 105   | 352    | 8  | -70 | -38 | Right      | Cerebellum    | Ventral Attention | Cerebellum 8 R     |
| 106   | 483    | 8  | -70 | -22 | Right      | Cerebellum    | Ventral Attention | Cerebellum 6 R     |
| 107   | 635    | 46 | -48 | -44 | Right      | Cerebellum    | Default           | Cerebellum Crus2 R |
| 108   | 408    | 18 | -48 | -54 | Right      | Cerebellum    | Somatomotor       | Cerebellum 9 R     |
| 109   | 537    | 24 | -60 | -54 | Right      | Cerebellum    | Ventral Attention | Cerebellum 8 R     |
| 110   | 527    | 22 | -56 | -24 | Right      | Cerebellum    | Somatomotor       | Cerebellum 6 R     |
| 111   | 680    | 12 | -86 | -36 | Right      | Cerebellum    | Default           | Cerebellum Crus2 R |
| 112   | 613    | 20 | -74 | -52 | Right      | Cerebellum    | Dorsal Attention  | Cerebellum 8 R     |
| 113   | 568    | 38 | -58 | -34 | Right      | Cerebellum    | Frontoparietal    | Cerebellum Crus1 R |
| 114   | 583    | 24 | -72 | -30 | Right      | Cerebellum    | Default           | Cerebellum Crus1 R |
| 115   | 393    | 8  | -58 | -52 | Right      | Cerebellum    | Default           | Cerebellum 9 R     |
| 116   | 934    | 44 | -66 | -50 | Right      | Cerebellum    | Frontoparietal    | Cerebellum Crus2 R |
| 117   | 330    | 8  | -54 | -36 | Right      | Cerebellum    | Default           | Cerebellum 9 R     |
| 118   | 481    | 34 | -48 | -56 | Right      | Cerebellum    | Ventral Attention | Cerebellum 8 R     |
| 119   | 473    | 32 | -38 | -32 | Right      | Cerebellum    | Ventral Attention | Cerebellum 6 R     |
| 120   | 200    | 24 | -38 | 24  | Right      | subcorticalGM | null              | Caudate R          |
| 121   | 474    | 14 | 12  | 10  | Right      | subcorticalGM | Frontoparietal    | Caudate R          |
| 122   | 319    | 16 | -6  | 20  | Right      | subcorticalGM | Frontoparietal    | Caudate R          |

| ROIid | Volume | X   | Y   | Z   | hemisphere | lobe          | name Yeo7         | name AAL2            |
|-------|--------|-----|-----|-----|------------|---------------|-------------------|----------------------|
| 123   | 453    | 14  | 20  | -2  | Right      | subcorticalGM | Default           | Caudate R            |
| 124   | 496    | 28  | 6   | 0   | Right      | subcorticalGM | Ventral Attention | Putamen R            |
| 125   | 624    | 16  | 8   | -10 | Right      | subcorticalGM | Limbic            | Putamen R            |
| 126   | 465    | 12  | -28 | -2  | Right      | subcorticalGM | Visual            | Thalamus R           |
| 127   | 391    | 14  | -28 | 12  | Right      | subcorticalGM | null              | Thalamus R           |
| 128   | 526    | 6   | -10 | 4   | Right      | subcorticalGM | null              | Thalamus R           |
| 129   | 278    | 6   | -38 | -54 | Right      | null          | Ventral Attention | null                 |
| 130   | 333    | 10  | -20 | -32 | Right      | null          | Limbic            | null                 |
| 131   | 187    | 8   | -24 | -46 | Right      | null          | Limbic            | null                 |
| 132   | 431    | 8   | -26 | -18 | Right      | Cerebellum    | Limbic            | Cerebellum 3 R       |
| 133   | 316    | 8   | -36 | -38 | Right      | Cerebellum    | Limbic            | Cerebellum 9 R       |
| 134   | 391    | -4  | 28  | -10 | Left       | Limbic        | Limbic            | Cingulate Ant L      |
| 135   | 363    | -18 | 18  | -22 | Left       | Frontal       | Limbic            | OFCmed L             |
| 136   | 263    | -4  | 18  | -22 | Left       | Frontal       | Limbic            | Rectus L             |
| 137   | 588    | -6  | 38  | -22 | Left       | Frontal       | Limbic            | Rectus L             |
| 138   | 583    | -6  | 48  | -6  | Left       | Frontal       | Default           | Frontal Med Orb L    |
| 139   | 682    | -18 | 56  | -16 | Left       | Frontal       | Limbic            | OFCant L             |
| 140   | 721    | -4  | 48  | 10  | Left       | Frontal       | Default           | Frontal Sup Medial L |
| 141   | 711    | -10 | 64  | 2   | Left       | Frontal       | Default           | Frontal Sup 2 L      |
| 142   | 511    | -28 | 54  | 2   | Left       | Frontal       | Frontoparietal    | Frontal Sup 2 L      |
| 143   | 574    | -42 | 46  | -8  | Left       | Frontal       | Default           | Frontal Mid 2 L      |
| 144   | 779    | -28 | 50  | 20  | Left       | Frontal       | Frontoparietal    | Frontal Mid 2 L      |
| 145   | 702    | -10 | 54  | 30  | Left       | Frontal       | Default           | Frontal Sup Medial L |
| 146   | 976    | -26 | 34  | 36  | Left       | Frontal       | Ventral Attention | Frontal Mid 2 L      |
| 147   | 880    | -46 | 28  | 26  | Left       | Frontal       | Frontoparietal    | Frontal Inf Tri L    |
| 148   | 1059   | -10 | 34  | 50  | Left       | Frontal       | Default           | Frontal Sup 2 L      |
| 149   | 855    | -38 | 16  | 46  | Left       | Frontal       | Default           | Frontal Mid 2 L      |
| 150   | 572    | -4  | 16  | 46  | Left       | Frontal       | Ventral Attention | Supp Motor Area L    |
| 151   | 776    | -46 | 28  | -10 | Left       | Frontal       | Default           | Frontal Inf Orb 2 L  |
| 152   | 499    | -28 | 34  | -16 | Left       | Frontal       | Frontoparietal    | OFCant L             |
| 153   | 485    | -32 | 20  | -16 | Left       | Frontal       | Default           | OFCpost L            |
| 154   | 769    | -42 | 40  | 10  | Left       | Frontal       | Frontoparietal    | Frontal Inf Tri L    |
| 155   | 562    | -32 | 22  | 4   | Left       | Insula        | Ventral Attention | Insula L             |
| 156   | 837    | -52 | 18  | 10  | Left       | Frontal       | Default           | Frontal Inf Tri L    |
| 157   | 840    | -46 | 6   | 28  | Left       | Frontal       | Frontoparietal    | Precentral L         |
| 158   | 621    | -40 | -16 | 44  | Left       | Parietal      | Somatomotor       | Postcentral L        |
| 159   | 646    | -58 | -6  | 26  | Left       | Parietal      | Somatomotor       | Postcentral L        |
| 160   | 222    | -16 | -20 | 68  | Left       | Parietal      | Somatomotor       | Paracentral Lobule L |
| 161   | 546    | -6  | -6  | 46  | Left       | Limbic        | Somatomotor       | Cingulate Mid L      |
| 162   | 905    | -8  | 0   | 64  | Left       | Frontal       | Ventral Attention | Supp Motor Area L    |
| 163   | 882    | -56 | -4  | 6   | Left       | Temporal      | Somatomotor       | Temporal Sup L       |

| ROIid | Volume | X   | Y   | Z   | hemisphere | lobe      | name Yeo7         | name AAL2            |
|-------|--------|-----|-----|-----|------------|-----------|-------------------|----------------------|
| 164   | 925    | -22 | 10  | 52  | Left       | Frontal   | Frontoparietal    | Frontal Sup 2 L      |
| 165   | 681    | -44 | -2  | 48  | Left       | Frontal   | Dorsal Attention  | Precentral L         |
| 166   | 443    | -26 | -10 | 54  | Left       | Frontal   | Dorsal Attention  | Precentral L         |
| 167   | 895    | -34 | -22 | 64  | Left       | Parietal  | Somatomotor       | Postcentral L        |
| 168   | 511    | -38 | 0   | 8   | Left       | Insula    | Ventral Attention | Insula L             |
| 169   | 505    | -38 | 8   | -6  | Left       | Insula    | Ventral Attention | Insula L             |
| 170   | 571    | -36 | -14 | -2  | Left       | Insula    | Ventral Attention | Insula L             |
| 171   | 841    | -50 | -24 | 40  | Left       | Parietal  | Dorsal Attention  | Postcentral L        |
| 172   | 422    | -22 | -32 | 62  | Left       | Parietal  | Somatomotor       | Postcentral L        |
| 173   | 440    | -40 | -16 | 12  | Left       | Frontal   | Somatomotor       | Rolandic Oper L      |
| 174   | 826    | -6  | -34 | 66  | Left       | Parietal  | Somatomotor       | Paracentral Lobule L |
| 175   | 1219   | -22 | -56 | 64  | Left       | Parietal  | Dorsal Attention  | Parietal Sup L       |
| 176   | 734    | -8  | -72 | 30  | Left       | Occipital | Visual            | Cuneus L             |
| 177   | 976    | -28 | -64 | 40  | Left       | Parietal  | Dorsal Attention  | Parietal Inf L       |
| 178   | 1060   | -8  | -68 | 54  | Left       | Parietal  | Dorsal Attention  | Precuneus L          |
| 179   | 767    | -34 | -40 | 46  | Left       | Parietal  | Dorsal Attention  | Parietal Inf L       |
| 180   | 548    | -42 | -32 | 14  | Left       | Temporal  | Somatomotor       | Temporal Sup L       |
| 181   | 855    | -58 | -26 | 18  | Left       | Parietal  | Ventral Attention | SupraMarginal L      |
| 182   | 947    | -42 | -66 | 40  | Left       | Parietal  | Default           | Angular L            |
| 183   | 942    | -50 | -58 | 20  | Left       | Temporal  | Default           | Temporal Mid L       |
| 184   | 1259   | -52 | -44 | 38  | Left       | Parietal  | Frontoparietal    | Parietal Inf L       |
| 185   | 349    | -36 | 6   | -38 | Left       | Temporal  | Limbic            | Temporal Inf L       |
| 186   | 475    | -34 | 18  | -34 | Left       | Temporal  | Limbic            | Temporal Pole Sup L  |
| 187   | 363    | -48 | 10  | -32 | Left       | Temporal  | Default           | Temporal Pole Mid L  |
| 188   | 749    | -48 | 6   | -16 | Left       | Temporal  | Default           | Temporal Pole Sup L  |
| 189   | 325    | -22 | 8   | -40 | Left       | Temporal  | Limbic            | Temporal Pole Mid L  |
| 190   | 536    | -56 | -8  | -24 | Left       | Temporal  | Default           | Temporal Mid L       |
| 191   | 859    | -58 | -30 | 2   | Left       | Temporal  | Default           | Temporal Mid L       |
| 192   | 943    | -56 | -48 | 4   | Left       | Temporal  | Default           | Temporal Mid L       |
| 193   | 756    | -58 | -28 | -20 | Left       | Temporal  | Default           | Temporal Mid L       |
| 194   | 373    | -48 | -6  | -38 | Left       | Temporal  | Limbic            | Temporal Inf L       |
| 195   | 299    | -36 | -14 | -30 | Left       | Temporal  | Limbic            | Temporal Inf L       |
| 196   | 313    | -50 | -20 | -30 | Left       | Temporal  | Limbic            | Temporal Inf L       |
| 197   | 757    | -56 | -16 | -10 | Left       | Temporal  | Default           | Temporal Mid L       |
| 198   | 493    | -26 | -44 | -18 | Left       | Occipital | Visual            | Fusiform L           |
| 199   | 1064   | -60 | -50 | -16 | Left       | Temporal  | Frontoparietal    | Temporal Inf L       |
| 200   | 442    | -42 | -54 | -18 | Left       | Occipital | Dorsal Attention  | Fusiform L           |
| 201   | 517    | -46 | -40 | -26 | Left       | Temporal  | Dorsal Attention  | Temporal Inf L       |
| 202   | 349    | -28 | -6  | -42 | Left       | Occipital | Limbic            | Fusiform L           |
| 203   | 906    | -40 | -76 | 22  | Left       | Occipital | Visual            | Occipital Mid L      |
| 204   | 593    | -30 | -88 | 12  | Left       | Occipital | Visual            | Occipital Mid L      |

| ROIid | Volume | X   | Y    | Z   | hemisphere | lobe       | name Yeo7         | name AAL2          |
|-------|--------|-----|------|-----|------------|------------|-------------------|--------------------|
| 205   | 599    | -16 | -52  | 0   | Left       | Occipital  | Visual            | Lingual L          |
| 206   | 578    | -42 | -72  | -14 | Left       | Occipital  | Visual            | Occipital Inf L    |
| 207   | 744    | -24 | -64  | -14 | Left       | Occipital  | Visual            | Fusiform L         |
| 208   | 1196   | -16 | -86  | 32  | Left       | Occipital  | Visual            | Occipital Sup L    |
| 209   | 771    | -48 | -68  | 0   | Left       | Temporal   | Dorsal Attention  | Temporal Mid L     |
| 210   | 527    | -34 | -86  | -4  | Left       | Occipital  | Visual            | Occipital Mid L    |
| 211   | 571    | -8  | -72  | -2  | Left       | Occipital  | Visual            | Lingual L          |
| 212   | 895    | -10 | -100 | 6   | Left       | Occipital  | Visual            | Calcarine L        |
| 213   | 975    | -14 | -84  | -14 | Left       | Occipital  | Visual            | Lingual L          |
| 214   | 649    | -22 | -98  | -12 | Left       | Occipital  | Visual            | Occipital Inf L    |
| 215   | 753    | -4  | -82  | 12  | Left       | Occipital  | Visual            | Calcarine L        |
| 216   | 461    | -22 | -68  | 6   | Left       | Occipital  | Visual            | Calcarine L        |
| 217   | 296    | -20 | -42  | 18  | Left       | Parietal   | Ventral Attention | Precuneus L        |
| 218   | 530    | -6  | -24  | 46  | Left       | Limbic     | Somatomotor       | Cingulate Mid L    |
| 219   | 729    | -4  | 34   | 26  | Left       | Limbic     | Default           | Cingulate Ant L    |
| 220   | 183    | -2  | -6   | 32  | Left       | Limbic     | Frontoparietal    | Cingulate Mid L    |
| 221   | 482    | -4  | 12   | 28  | Left       | Limbic     | Ventral Attention | Cingulate Mid L    |
| 222   | 699    | -8  | -60  | 16  | Left       | Parietal   | Default           | Precuneus L        |
| 223   | 365    | -4  | -38  | 32  | Left       | Limbic     | Default           | Cingulate Mid L    |
| 224   | 291    | -6  | -20  | 26  | Left       | Limbic     | Default           | Cingulate Mid L    |
| 225   | 650    | -6  | -56  | 36  | Left       | Parietal   | Default           | Precuneus L        |
| 226   | 608    | -8  | -44  | 50  | Left       | Parietal   | Ventral Attention | Precuneus L        |
| 227   | 223    | -6  | -44  | 12  | Left       | Limbic     | Default           | Cingulate Post L   |
| 228   | 519    | -26 | 2    | -20 | Left       | Limbic     | Limbic            | Amygdala L         |
| 229   | 295    | -20 | -38  | 4   | Left       | Limbic     | null              | Hippocampus L      |
| 230   | 314    | -32 | -42  | -4  | Left       | Limbic     | Visual            | Hippocampus L      |
| 231   | 602    | -22 | -14  | -18 | Left       | Limbic     | Limbic            | Hippocampus L      |
| 232   | 318    | -34 | -26  | -16 | Left       | Limbic     | Limbic            | Hippocampus L      |
| 233   | 447    | -20 | -32  | -12 | Left       | Limbic     | Default           | ParaHippocampal L  |
| 234   | 400    | -30 | -24  | -28 | Left       | Occipital  | Limbic            | Fusiform L         |
| 235   | 405    | -20 | -6   | -30 | Left       | Limbic     | Limbic            | ParaHippocampal L  |
| 236   | 407    | -6  | -68  | -38 | Left       | Cerebellum | Ventral Attention | Cerebellum 8 L     |
| 237   | 347    | -8  | -52  | -40 | Left       | Cerebellum | Default           | Cerebellum 9 L     |
| 238   | 555    | -36 | -54  | -32 | Left       | Cerebellum | Ventral Attention | Cerebellum Crus1 L |
| 239   | 324    | -8  | -56  | -54 | Left       | Cerebellum | Default           | Cerebellum 9 L     |
| 240   | 488    | -20 | -72  | -50 | Left       | Cerebellum | Dorsal Attention  | Cerebellum 8 L     |
| 241   | 1025   | -38 | -76  | -30 | Left       | Cerebellum | Default           | Cerebellum Crus1 L |
| 242   | 663    | -30 | -82  | -42 | Left       | Cerebellum | Default           | Cerebellum Crus2 L |
| 243   | 325    | -18 | -48  | -54 | Left       | Cerebellum | Somatomotor       | Cerebellum 9 L     |
| 244   | 677    | -6  | -52  | -12 | Left       | Cerebellum | Somatomotor       | Cerebellum 4 5 L   |
| 245   | 387    | -26 | -36  | -32 | Left       | Cerebellum | Ventral Attention | Cerebellum 4 5 L   |

| ROIid | Volume | X   | Y   | Z   | hemisphere | lobe          | name Yeo7         | name AAL2          |
|-------|--------|-----|-----|-----|------------|---------------|-------------------|--------------------|
| 246   | 844    | -42 | -64 | -48 | Left       | Cerebellum    | Frontoparietal    | Cerebellum Crus2 L |
| 247   | 716    | -10 | -82 | -34 | Left       | Cerebellum    | Frontoparietal    | Cerebellum Crus2 L |
| 248   | 590    | -6  | -70 | -20 | Left       | Cerebellum    | Ventral Attention | Cerebellum 6 L     |
| 249   | 484    | -34 | -52 | -56 | Left       | Cerebellum    | Ventral Attention | Cerebellum 8 L     |
| 250   | 398    | -22 | -60 | -50 | Left       | Cerebellum    | Ventral Attention | Cerebellum 8 L     |
| 251   | 457    | -10 | -40 | -26 | Left       | Cerebellum    | Limbic            | Cerebellum 4 5 L   |
| 252   | 572    | -46 | -48 | -44 | Left       | Cerebellum    | Frontoparietal    | Cerebellum Crus1 L |
| 253   | 650    | -26 | -70 | -32 | Left       | Cerebellum    | Frontoparietal    | Cerebellum Crus1 L |
| 254   | 425    | -20 | -54 | -24 | Left       | Cerebellum    | Somatomotor       | Cerebellum 6 L     |
| 255   | 332    | -6  | -56 | -28 | Left       | Cerebellum    | Limbic            | Cerebellum 4 5 L   |
| 256   | 223    | -24 | -38 | -46 | Left       | Cerebellum    | Ventral Attention | Cerebellum 10 L    |
| 257   | 194    | -8  | 24  | 10  | Left       | subcorticalGM | null              | Caudate L          |
| 258   | 402    | -12 | 10  | 8   | Left       | subcorticalGM | Default           | Caudate L          |
| 259   | 847    | -10 | 10  | -10 | Left       | subcorticalGM | Limbic            | Caudate L          |
| 260   | 298    | -14 | -4  | 20  | Left       | subcorticalGM | Frontoparietal    | Caudate L          |
| 261   | 493    | -24 | 4   | -2  | Left       | subcorticalGM | Frontoparietal    | Putamen L          |
| 262   | 430    | -8  | -26 | -2  | Left       | subcorticalGM | null              | Thalamus L         |
| 263   | 590    | -4  | -12 | 4   | Left       | subcorticalGM | null              | Thalamus L         |
| 264   | 385    | -10 | -26 | 14  | Left       | subcorticalGM | Frontoparietal    | Thalamus L         |
| 265   | 475    | -4  | -22 | -16 | Left       | Cerebellum    | null              | Cerebellum 3 L     |
| 266   | 352    | -4  | -38 | -54 | Left       | Cerebellum    | Default           | Cerebellum 9 L     |
| 267   | 352    | -6  | -34 | -40 | Left       | Cerebellum    | Limbic            | Cerebellum 10 L    |
| 268   | 331    | -4  | -20 | -38 | Left       | null          | Limbic            | null               |

SUPPLEMENTARY TABLE 11

External parcellation set (Shen & Finn 2015).

### 3 GLOBAL EFFECTS

#### 3.1 WORKING-MEMORY MAINTENANCE EVOKES A LOW-ACTIVITY HIGH-CONNECTIVITY STATE

To estimate dynamic functional connectivity (FC), single subject models were constructed using gPPI, in which the task-related changes in cross correlations between each pair of ROIs was estimated for each stage of each individual trial while accounting for confounds (i.e., movements, the mean cross correlation between each pair, and task-related change in activation magnitude see above). The resultant PPI parameter estimates were taken to the group level, creating stacks of observations with identical dimensions to those defined for activation, but with each observation having a greater number of features.

Both activity and connectivity estimates were averaged across load, domain and runs producing a stack of subject x stage observations. Activity estimates were averaged across each HCL cluster. Connectivity estimates were averaged for all pairs of ROIs **within** each HCL cluster, producing five intra-cluster summary measures of dynamic connectivity for each of the three WM stages. This process was then repeated for FC estimates for ROIs pairs **between** different HCL clusters, producing ten summary estimates of inter-cluster dynamic connectivity for each WM state.

| Study  | Cluster | Mean    | Std    | t       | df | Sig    | P FDR  | ci              |
|--------|---------|---------|--------|---------|----|--------|--------|-----------------|
| Study1 | FPT     | 0.2711  | 0.0899 | 13.1459 | 18 | 0.0000 | 0.0000 | 0.2278 0.3144   |
| Study2 | FPT     | 0.0615  | 0.1015 | 2.4239  | 15 | 0.0285 | 0.0356 | 0.0074 0.1156   |
| Study1 | SMT     | -0.1792 | 0.1570 | -4.9764 | 18 | 0.0001 | 0.0002 | -0.2549 -0.1035 |
| Study2 | SMT     | -0.1344 | 0.1425 | -3.7723 | 15 | 0.0018 | 0.0026 | -0.2103 -0.0585 |
| Study1 | IPT     | 0.0540  | 0.1303 | 1.8075  | 18 | 0.0874 | 0.0874 | -0.0088 0.1168  |
| Study2 | IPT     | -0.0598 | 0.1148 | -2.0813 | 15 | 0.0549 | 0.0611 | -0.1210 0.0014  |
| Study1 | AVS     | 0.9721  | 0.2579 | 16.4272 | 18 | 0.0000 | 0.0000 | 0.8478 1.0964   |
| Study2 | AVS     | 0.5709  | 0.1138 | 20.0722 | 15 | 0.0000 | 0.0000 | 0.5103 0.6316   |
| Study1 | PVS     | 1.3095  | 0.4537 | 12.5817 | 18 | 0.0000 | 0.0000 | 1.0908 1.5281   |
| Study2 | PVS     | 0.7293  | 0.2891 | 10.0916 | 15 | 0.0000 | 0.0000 | 0.5753 0.8834   |

SUPPLEMENTARY TABLE 12

Paired measure t-test was performed on the difference between activation in Encode and Maintain over the FPT, SMT, IPT, AVS and PVS clusters.

| Study  | Stage    | Cluster | Mean    | Std    | t       | df | Sig    | P FDR  | ci              |
|--------|----------|---------|---------|--------|---------|----|--------|--------|-----------------|
| Study1 | Encode   | FPT     | 0.6080  | 0.1735 | 15.2742 | 18 | 0.0000 | 0.0000 | 0.5244 0.6916   |
| Study2 | Encode   | FPT     | 0.5223  | 0.1763 | 11.8530 | 15 | 0.0000 | 0.0000 | 0.4284 0.6163   |
| Study1 | Maintain | FPT     | 0.3369  | 0.1367 | 10.7448 | 18 | 0.0000 | 0.0000 | 0.2710 0.4028   |
| Study2 | Maintain | FPT     | 0.4608  | 0.1432 | 12.8760 | 15 | 0.0000 | 0.0000 | 0.3845 0.5371   |
| Study1 | Encode   | SMT     | 0.0435  | 0.2683 | 0.7060  | 18 | 0.4892 | 0.5149 | -0.0859 0.1728  |
| Study2 | Encode   | SMT     | 0.0460  | 0.1986 | 0.9260  | 15 | 0.3691 | 0.4101 | -0.0599 0.1518  |
| Study1 | Maintain | SMT     | 0.2227  | 0.2023 | 4.7974  | 18 | 0.0001 | 0.0002 | 0.1252 0.3202   |
| Study2 | Maintain | SMT     | 0.1804  | 0.1311 | 5.5052  | 15 | 0.0001 | 0.0001 | 0.1105 0.2502   |
| Study1 | Encode   | IPT     | 0.2299  | 0.1557 | 6.4381  | 18 | 0.0000 | 0.0000 | 0.1549 0.3050   |
| Study2 | Encode   | IPT     | 0.1496  | 0.1774 | 3.3745  | 15 | 0.0042 | 0.0060 | 0.0551 0.2441   |
| Study1 | Maintain | IPT     | 0.1759  | 0.1237 | 6.1977  | 18 | 0.0000 | 0.0000 | 0.1163 0.2356   |
| Study2 | Maintain | IPT     | 0.2094  | 0.1076 | 7.7821  | 15 | 0.0000 | 0.0000 | 0.1520 0.2667   |
| Study1 | Encode   | AVS     | 0.9143  | 0.2303 | 17.3020 | 18 | 0.0000 | 0.0000 | 0.8033 1.0253   |
| Study2 | Encode   | AVS     | 0.5812  | 0.1541 | 15.0893 | 15 | 0.0000 | 0.0000 | 0.4991 0.6633   |
| Study1 | Maintain | AVS     | -0.0578 | 0.0906 | -2.7781 | 18 | 0.0124 | 0.0165 | -0.1015 -0.0141 |
| Study2 | Maintain | AVS     | 0.0102  | 0.0996 | 0.4108  | 15 | 0.6871 | 0.6871 | -0.0428 0.0633  |
| Study1 | Encode   | PVS     | 1.2437  | 0.4717 | 11.4926 | 18 | 0.0000 | 0.0000 | 1.0163 1.4711   |
| Study2 | Encode   | PVS     | 0.6785  | 0.2461 | 11.0264 | 15 | 0.0000 | 0.0000 | 0.5473 0.8096   |
| Study1 | Maintain | PVS     | -0.0658 | 0.1919 | -1.4937 | 18 | 0.1526 | 0.1907 | -0.1582 0.0267  |
| Study2 | Maintain | PVS     | -0.0509 | 0.1876 | -1.0846 | 15 | 0.2952 | 0.3473 | -0.1508 0.0491  |

SUPPLEMENTARY TABLE 13

1-sample t-test was performed on the mean activity of both Encode and Maintain over the FPT, SMT, IPT, AVS and PVS clusters.

| Study  | Cluster | Mean    | Std    | t       | df | Sig    | ci              |
|--------|---------|---------|--------|---------|----|--------|-----------------|
| Study1 | FPT FPT | 0.0025  | 0.0200 | 0.5475  | 18 | 0.5908 | -0.0071 0.0122  |
| Study1 | SMT SMT | -0.0359 | 0.0322 | -4.8606 | 18 | 0.0001 | -0.0514 -0.0204 |
| Study1 | IPT IPT | -0.0023 | 0.0148 | -0.6795 | 18 | 0.5054 | -0.0094 0.0048  |
| Study1 | AVS AVS | 0.0249  | 0.0212 | 5.1281  | 18 | 0.0001 | 0.0147 0.0351   |
| Study1 | PVS PVS | 0.0177  | 0.0294 | 2.6273  | 18 | 0.0171 | 0.0035 0.0319   |
| Study2 | FPT FPT | 0.0010  | 0.0295 | 0.1321  | 15 | 0.8967 | -0.0148 0.0167  |
| Study2 | SMT SMT | -0.0294 | 0.0254 | -4.6427 | 15 | 0.0003 | -0.0430 -0.0159 |
| Study2 | IPT IPT | -0.0088 | 0.0124 | -2.8422 | 15 | 0.0124 | -0.0154 -0.0022 |
| Study2 | AVS AVS | 0.0057  | 0.0322 | 0.7064  | 15 | 0.4908 | -0.0115 0.0228  |
| Study2 | PVS PVS | 0.0081  | 0.0399 | 0.8110  | 15 | 0.4300 | -0.0132 0.0294  |

**SUPPLEMENTARY TABLE 14**

Paired measure t-test was performed on the difference between Encode and Maintain over the intra-FC clusters.

| Study  | Stage    | Cluster | Mean   | Std    | t       | df | Sig    | ci            |
|--------|----------|---------|--------|--------|---------|----|--------|---------------|
| Study1 | Encode   | FPT FPT | 0.0795 | 0.0175 | 19.8167 | 18 | 0.0000 | 0.0710 0.0879 |
| Study1 | Maintain | FPT FPT | 0.0770 | 0.0145 | 23.0916 | 18 | 0.0000 | 0.0700 0.0840 |
| Study1 | Encode   | SMT SMT | 0.0475 | 0.0306 | 6.7564  | 18 | 0.0000 | 0.0327 0.0622 |
| Study1 | Maintain | SMT SMT | 0.0834 | 0.0209 | 17.4031 | 18 | 0.0000 | 0.0733 0.0934 |
| Study1 | Encode   | IPT IPT | 0.0538 | 0.0138 | 17.0619 | 18 | 0.0000 | 0.0472 0.0605 |
| Study1 | Maintain | IPT IPT | 0.0561 | 0.0109 | 22.5119 | 18 | 0.0000 | 0.0509 0.0614 |
| Study1 | Encode   | AVS AVS | 0.1286 | 0.0217 | 25.7909 | 18 | 0.0000 | 0.1182 0.1391 |
| Study1 | Maintain | AVS AVS | 0.1037 | 0.0157 | 28.7823 | 18 | 0.0000 | 0.0961 0.1113 |
| Study1 | Encode   | PVS PVS | 0.1352 | 0.0232 | 25.4523 | 18 | 0.0000 | 0.1241 0.1464 |
| Study1 | Maintain | PVS PVS | 0.1175 | 0.0169 | 30.2562 | 18 | 0.0000 | 0.1094 0.1257 |
| Study2 | Encode   | FPT FPT | 0.0830 | 0.0230 | 14.4377 | 15 | 0.0000 | 0.0708 0.0953 |
| Study2 | Maintain | FPT FPT | 0.0821 | 0.0199 | 16.4948 | 15 | 0.0000 | 0.0715 0.0927 |
| Study2 | Encode   | SMT SMT | 0.0441 | 0.0280 | 6.3083  | 15 | 0.0000 | 0.0292 0.0590 |
| Study2 | Maintain | SMT SMT | 0.0736 | 0.0235 | 12.5058 | 15 | 0.0000 | 0.0610 0.0861 |
| Study2 | Encode   | IPT IPT | 0.0504 | 0.0080 | 25.0667 | 15 | 0.0000 | 0.0461 0.0547 |
| Study2 | Maintain | IPT IPT | 0.0593 | 0.0107 | 22.1107 | 15 | 0.0000 | 0.0535 0.0650 |
| Study2 | Encode   | AVS AVS | 0.1095 | 0.0253 | 17.2996 | 15 | 0.0000 | 0.0960 0.1230 |
| Study2 | Maintain | AVS AVS | 0.1038 | 0.0154 | 27.0395 | 15 | 0.0000 | 0.0956 0.1120 |
| Study2 | Encode   | PVS PVS | 0.1320 | 0.0271 | 19.4688 | 15 | 0.0000 | 0.1176 0.1465 |
| Study2 | Maintain | PVS PVS | 0.1239 | 0.0246 | 20.1666 | 15 | 0.0000 | 0.1108 0.1370 |

**SUPPLEMENTARY TABLE 15**

1-sample t-test was performed on the mean intra-connectivity of both Encode and Maintain over the intra-FC clusters.



| Study  | Cluster | Mean    | Std    | t       | df | Sig    | ci              |
|--------|---------|---------|--------|---------|----|--------|-----------------|
| Study1 | FPT SMT | -0.0360 | 0.0172 | -9.1110 | 18 | 0.0000 | -0.0443 -0.0277 |
| Study1 | FPT IPT | -0.0043 | 0.0136 | -1.3809 | 18 | 0.1842 | -0.0109 0.0022  |
| Study1 | FPT AVS | 0.0243  | 0.0207 | 5.1051  | 18 | 0.0001 | 0.0143 0.0343   |
| Study1 | FPT PVS | 0.0312  | 0.0218 | 6.2399  | 18 | 0.0000 | 0.0207 0.0417   |
| Study1 | SMT IPT | -0.0234 | 0.0134 | -7.6132 | 18 | 0.0000 | -0.0299 -0.0170 |
| Study1 | SMT AVS | -0.0363 | 0.0204 | -7.7533 | 18 | 0.0000 | -0.0461 -0.0264 |
| Study1 | SMT PVS | -0.0266 | 0.0243 | -4.7609 | 18 | 0.0002 | -0.0383 -0.0149 |
| Study1 | IPT AVS | 0.0064  | 0.0172 | 1.6294  | 18 | 0.1206 | -0.0019 0.0147  |
| Study1 | IPT PVS | 0.0068  | 0.0179 | 1.6493  | 18 | 0.1164 | -0.0019 0.0154  |
| Study1 | AVS PVS | 0.0208  | 0.0258 | 3.5106  | 18 | 0.0025 | 0.0083 0.0332   |
| Study2 | FPT SMT | -0.0220 | 0.0241 | -3.6632 | 15 | 0.0023 | -0.0349 -0.0092 |
| Study2 | FPT IPT | -0.0093 | 0.0141 | -2.6190 | 15 | 0.0194 | -0.0168 -0.0017 |
| Study2 | FPT AVS | 0.0278  | 0.0274 | 4.0583  | 15 | 0.0010 | 0.0132 0.0423   |
| Study2 | FPT PVS | 0.0266  | 0.0306 | 3.4723  | 15 | 0.0034 | 0.0103 0.0429   |
| Study2 | SMT IPT | -0.0142 | 0.0156 | -3.6398 | 15 | 0.0024 | -0.0226 -0.0059 |
| Study2 | SMT AVS | -0.0270 | 0.0271 | -3.9849 | 15 | 0.0012 | -0.0414 -0.0126 |
| Study2 | SMT PVS | -0.0198 | 0.0264 | -2.9927 | 15 | 0.0091 | -0.0339 -0.0057 |
| Study2 | IPT AVS | -0.0019 | 0.0144 | -0.5134 | 15 | 0.6151 | -0.0095 0.0058  |
| Study2 | IPT PVS | -0.0046 | 0.0158 | -1.1579 | 15 | 0.2650 | -0.0130 0.0038  |
| Study2 | AVS PVS | 0.0125  | 0.0355 | 1.4118  | 15 | 0.1784 | -0.0064 0.0315  |

**SUPPLEMENTARY TABLE 16**

Paired measure t-test was performed on the difference between Encode and Maintain over the inter-FC clusters.

### 3.2 ANALYSIS OF INDIVIDUAL DG ROIS

| Name                    | Term | FStat   | DF1 | DF2 | pValue | bonf p |
|-------------------------|------|---------|-----|-----|--------|--------|
| mean Occipital Sup R    | load | 3.4020  | 2   | 54  | 0.0406 | 0.5942 |
| mean Parietal Sup L     | load | 11.6151 | 2   | 54  | 0.0001 | 0.0017 |
| mean Occipital Mid R    | load | 2.0607  | 2   | 54  | 0.1373 | 1.3726 |
| mean Occipital Mid L    | load | 1.7364  | 2   | 54  | 0.1859 | 1.6727 |
| mean Supp Motor Area L  | load | 5.5216  | 2   | 54  | 0.0066 | 0.1316 |
| mean Occipital Sup L    | load | 2.9058  | 2   | 54  | 0.0633 | 0.8229 |
| mean Precentral L       | load | 0.2365  | 2   | 54  | 0.7902 | 1.3170 |
| mean Precentral L 1     | load | 18.7921 | 2   | 54  | 0.0000 | 0.0000 |
| mean Parietal Sup R     | load | 10.4143 | 2   | 54  | 0.0001 | 0.0039 |
| mean Frontal Inf Oper R | load | 2.8018  | 2   | 54  | 0.0695 | 0.8345 |
| mean Fusiform L         | load | 1.1182  | 2   | 54  | 0.3343 | 2.0297 |
| mean Fusiform R         | load | 5.8659  | 2   | 54  | 0.0050 | 0.1089 |
| mean Lingual R          | load | 1.0856  | 2   | 54  | 0.3450 | 2.0060 |
| mean Precentral L 2     | load | 26.9557 | 2   | 54  | 0.0000 | 0.0000 |
| mean Frontal Sup 2 R    | load | 7.4331  | 2   | 54  | 0.0014 | 0.0338 |
| mean Parietal Inf L     | load | 14.1915 | 2   | 54  | 0.0000 | 0.0003 |
| mean Postcentral L      | load | 0.4926  | 2   | 54  | 0.6138 | 1.8413 |
| mean Temporal Inf R     | load | 1.2669  | 2   | 54  | 0.2900 | 2.2094 |
| mean Lingual L          | load | 4.9088  | 2   | 54  | 0.0110 | 0.2089 |
| mean Lingual R 1        | load | 3.6695  | 2   | 54  | 0.0320 | 0.5127 |
| mean Postcentral L 1    | load | 3.4295  | 2   | 54  | 0.0396 | 0.5942 |
| mean Calcarine R        | load | 5.6696  | 2   | 54  | 0.0058 | 0.1222 |
| mean Thalamus L         | load | 6.2341  | 2   | 54  | 0.0037 | 0.0843 |
| mean Insula L           | load | 25.6473 | 2   | 54  | 0.0000 | 0.0000 |
| mean Insula R           | load | 14.3226 | 2   | 54  | 0.0000 | 0.0003 |
| mean Calcarine L        | load | 2.3735  | 2   | 54  | 0.1028 | 1.1309 |
| mean Thalamus R         | load | 4.0788  | 2   | 54  | 0.0224 | 0.3808 |
| mean Thalamus R 1       | load | 0.4210  | 2   | 54  | 0.6585 | 1.8413 |
| mean Thalamus L 1       | load | 1.3179  | 2   | 54  | 0.2762 | 2.2094 |
| mean Rolandic Oper L    | load | 1.0613  | 2   | 54  | 0.3531 | 1.7249 |
| mean SupraMarginal R    | load | 27.7152 | 2   | 54  | 0.0000 | 0.0000 |
| mean Frontal Inf Tri L  | load | 4.3339  | 2   | 54  | 0.0180 | 0.3234 |
| mean Putamen L          | load | 8.6588  | 2   | 54  | 0.0005 | 0.0137 |

SUPPLEMENTARY TABLE 17

Maintain specific ROI (using the DG set) activation load effects.

### 3.3 LOAD RELATED CHANGES IN ACTIVITY AND CONNECTIVITY AS A FUNCTION OF STAGE

Here we averaged across the three clusters (FPT, AVs and PVS) separately for activity, inter-cluster FC and intra-cluster FC), and then standardized each measure independently. Then we used repeated measures ANOVA where the within factors were activity/connectivity and load. There was no significant main effect for activity/connectivity ( $F_{2,36} = 0.0001, p = 1$ ), a strong main effect for load ( $F_{2,36} = 10.52, p = 0.0011$ ) and a significant effect for the interaction between load and activity/connectivity ( $F_{4,72} = 11.93, p < 0.0001$ ). Further analysis showed that this interaction was driven by a robust effect of load for both connectivity measures ( $F^{inter} = 7.05, p = 0.0027; F^{intra} = 22.56, p < 0.0001$ ;) but not the activity measures. Specifically, inter-FC was significantly greater for medium vs. low load ( $t = 3.42, p < 0.01$ ) and there was a threshold-level effect for high vs. medium load ( $t = 2.59, p = 0.0547$ ). Similarly, intra-FC was significantly greater for both medium vs. low load ( $t = 5.13, p < 0.0005$ ) and high vs medium load ( $t = 5.67, p < 0.0001$ ). Similar effects were found in Study 2 for the same analysis. These findings suggest that maintaining higher WM loads increases network functional connectivity substantially but has little impact on overall network activation levels.

#### 3.3.1 STUDY ONE

| Terms                   | SumSq   | DF | MeanSq | F       | pValueGG |
|-------------------------|---------|----|--------|---------|----------|
| (Intercept)             | 0.0001  | 1  | 0.0001 | 0.0001  | 1.0000   |
| Error                   | 6.9423  | 18 | 0.3857 | 1.0000  | 0.5000   |
| (Intercept):metric      | 0.0001  | 2  | 0.0001 | 0.0001  | 1.0000   |
| Error(metric)           | 15.6251 | 36 | 0.4341 | 1.0000  | 0.5000   |
| (Intercept):load        | 7.4459  | 2  | 3.7230 | 10.5245 | 0.0011   |
| Error(load)             | 12.7347 | 36 | 0.3538 | 1.0000  | 0.5000   |
| (Intercept):metric:load | 5.7688  | 4  | 1.4422 | 11.9262 | 0.0001   |
| Error(metric:load)      | 8.7068  | 72 | 0.1210 | 1.0000  | 0.5000   |

SUPPLEMENTARY TABLE 18

Repeated measures two-way ANOVA was used to interrogate the effects of load over metric in study one.

| Terms            | SumSq  | DF | MeanSq | F      | pValueGG |
|------------------|--------|----|--------|--------|----------|
| (Intercept)      | 0.0001 | 1  | 0.0001 | 0.0001 | 1.0000   |
| Error            | 7.0308 | 18 | 0.3906 | 1.0000 | 0.5000   |
| (Intercept):load | 0.2139 | 2  | 0.1070 | 0.7448 | 0.4366   |
| Error(load)      | 5.1695 | 36 | 0.1436 | 1.0000 | 0.5000   |

SUPPLEMENTARY TABLE 19

Repeated measures one way ANOVA was used to interrogate the effects of load for activation in study one.

| Terms            | SumSq  | DF | MeanSq | F      | pValue |
|------------------|--------|----|--------|--------|--------|
| (Intercept)      | 0.0001 | 1  | 0.0001 | 0.0001 | 1.0000 |
| Error            | 7.9262 | 18 | 0.4404 | 1.0000 | 0.5000 |
| (Intercept):load | 3.3578 | 2  | 1.6789 | 7.0472 | 0.0027 |
| Error(load)      | 8.5764 | 36 | 0.2383 | 1.0000 | 0.5000 |

SUPPLEMENTARY TABLE 20

Repeated measures one way ANOVA was used to interrogate the effects of load for inter-connectivity in study one.

| load 1 | load 2 | Difference | StdErr | t       | pValue | Lower   | Upper   |
|--------|--------|------------|--------|---------|--------|---------|---------|
| High   | Low    | 0.4892     | 0.1884 | 2.5970  | 0.0547 | -0.0079 | 0.9863  |
| High   | Med    | -0.0480    | 0.1229 | -0.3914 | 1.0000 | -0.3722 | 0.2761  |
| Low    | High   | -0.4891    | 0.1884 | -2.5969 | 0.0547 | -0.9862 | 0.0080  |
| Low    | Med    | -0.5372    | 0.1571 | -3.4204 | 0.0092 | -0.9517 | -0.1227 |
| Med    | High   | 0.0481     | 0.1229 | 0.3915  | 1.0000 | -0.2760 | 0.3723  |
| Med    | Low    | 0.5373     | 0.1571 | 3.4205  | 0.0092 | 0.1228  | 0.9518  |

**SUPPLEMENTARY TABLE 21**

Multicomparison post hoc test (Bonferroni corrected) was used to interrogate the significant main effect of load found in the Repeated measures ANOVA for inter-connectivity.

| Terms            | SumSq  | DF | MeanSq | F       | pValue |
|------------------|--------|----|--------|---------|--------|
| (Intercept)      | 0.0001 | 1  | 0.0001 | 0.0001  | 1.0000 |
| Error            | 7.6105 | 18 | 0.4229 | 1.0000  | 0.5000 |
| (Intercept):load | 9.6431 | 2  | 4.8216 | 22.5553 | 0.0001 |
| Error(load)      | 7.6956 | 36 | 0.2138 | 1.0000  | 0.5000 |

**SUPPLEMENTARY TABLE 22**

Repeated measures one way ANOVA was used to interrogate the effects of load for intra-connectivity in study one

| load 1 | load 2 | Difference | StdErr | t       | pValue | Lower   | Upper   |
|--------|--------|------------|--------|---------|--------|---------|---------|
| High   | Low    | 0.9528     | 0.1680 | 5.6736  | 0.0001 | 0.5096  | 1.3960  |
| High   | Med    | 0.1927     | 0.1318 | 1.4621  | 0.4830 | -0.1550 | 0.5404  |
| Low    | High   | -0.9527    | 0.1680 | -5.6735 | 0.0001 | -1.3959 | -0.5095 |
| Low    | Med    | -0.7601    | 0.1482 | -5.1309 | 0.0003 | -1.1510 | -0.3691 |
| Med    | High   | -0.1926    | 0.1318 | -1.4620 | 0.4830 | -0.5403 | 0.1551  |
| Med    | Low    | 0.7602     | 0.1482 | 5.1310  | 0.0003 | 0.3692  | 1.1511  |

**SUPPLEMENTARY TABLE 23**

Multicomparison post hoc test (bonferroni corrected) was used to interrogate the significant main effect of load found in the Repeated measures ANOVA for intra-connectivity.

### 3.3.2 STUDY TWO

| Terms                   | SumSq  | DF | MeanSq | F      | pValueGG |
|-------------------------|--------|----|--------|--------|----------|
| (Intercept)             | 0.0001 | 1  | 0.0001 | 0.0001 | 1.0000   |
| Error                   | 5.2347 | 15 | 0.3490 | 1.0000 | 0.5000   |
| (Intercept):metric      | 0.0001 | 2  | 0.0001 | 0.0001 | 1.0000   |
| Error(metric)           | 9.0071 | 30 | 0.3003 | 1.0000 | 0.5000   |
| (Intercept):load        | 2.4252 | 1  | 2.4252 | 5.5895 | 0.0320   |
| Error(load)             | 6.5083 | 15 | 0.4339 | 1.0000 | 0.5000   |
| (Intercept):metric:load | 1.6405 | 2  | 0.8203 | 3.9232 | 0.0613   |
| Error(metric:load)      | 6.2723 | 30 | 0.2091 | 1.0000 | 0.5000   |

**SUPPLEMENTARY TABLE 24**

Repeated measures ANOVA was used to interrogate the effects of load over stage for activation in study two.

| load 1 | load 2 | Difference | StdErr | t       | pValue | Lower   | Upper   |
|--------|--------|------------|--------|---------|--------|---------|---------|
| High   | Low    | 0.3179     | 0.1345 | 2.3643  | 0.0320 | 0.0313  | 0.6045  |
| Low    | High   | -0.3178    | 0.1345 | -2.3642 | 0.0320 | -0.6044 | -0.0312 |

**SUPPLEMENTARY TABLE 25**

Multicomparison post hoc test (Bonferroni corrected) was used to interrogate the significant main effect of load found in the Repeated measures ANOVA.

| metric | load 1 | load 2 | Difference | t       | StdErr | pValue | Lower   | Upper   |
|--------|--------|--------|------------|---------|--------|--------|---------|---------|
| BA     | High   | Low    | 0.0370     | 0.4846  | 0.0763 | 0.6350 | -0.1255 | 0.1995  |
| BA     | Low    | High   | -0.0369    | -0.4845 | 0.0763 | 0.6350 | -0.1994 | 0.1256  |
| Inter  | High   | Low    | 0.2502     | 1.2458  | 0.2009 | 0.2320 | -0.1778 | 0.6783  |
| Inter  | Low    | High   | -0.2501    | -1.2457 | 0.2009 | 0.2320 | -0.6782 | 0.1779  |
| Intra  | High   | Low    | 0.6666     | 2.7130  | 0.2457 | 0.0161 | 0.1429  | 1.1902  |
| Intra  | Low    | High   | -0.6665    | -2.7129 | 0.2457 | 0.0161 | -1.1901 | -0.1428 |

**SUPPLEMENTARY TABLE 26**

Multicomparison post hoc test (Bonferroni corrected) was used to interrogate the significant interaction of load by stage found in the Repeated measures ANOVA.

## 4 DECODING WM FACTORS

We used a multivariate classifier over the averaged stacks from both activation and connectivity measures to estimate the decoding performance of processing stages or visual domains using a dense (multi-class SVM) algorithm.

| set | factor | metric | GroupCount | Null    | oob     | CV      | Test    |
|-----|--------|--------|------------|---------|---------|---------|---------|
| DG  | Domain | BA     | 1000       | 33.3377 | 85.7968 | 82.3358 | 70.5991 |
| DG  | Domain | PPI    | 1000       | 32.5999 | 90.3654 | 86.5505 | 85.7778 |
| DG  | Stage  | BA     | 1000       | 31.8465 | 98.6538 | 96.3266 | 91.3703 |
| DG  | Stage  | PPI    | 1000       | 33.4111 | 91.7972 | 91.9802 | 87.5856 |
| SG  | Domain | BA     | 1000       | 32.5326 | 66.6699 | 58.1029 | 75.1937 |
| SG  | Domain | PPI    | 1000       | 33.0023 | 82.8266 | 76.8833 | 83.6021 |
| SG  | Stage  | BA     | 1000       | 32.3974 | 93.5795 | 86.4755 | 75.8919 |
| SG  | Stage  | PPI    | 1000       | 32.2003 | 84.4398 | 75.0221 | 76.1367 |
| WB  | Domain | BA     | 1000       | 32.3911 | 87.6760 | 79.8539 | 91.7500 |
| WB  | Domain | PPI    | 1000       | 31.8702 | 85.2778 | 81.5539 | 87.9257 |
| WB  | Stage  | BA     | 1000       | 31.9712 | 99.2968 | 98.4365 | 90.8931 |
| WB  | Stage  | PPI    | 1000       | 31.5735 | 92.3563 | 90.2065 | 81.1832 |

**SUPPLEMENTARY TABLE 27**

Mean performance of different classification models

| Metric | Factor | ROI set | mean F1 | std F1 | MannWhitneyR | p value | CI              |
|--------|--------|---------|---------|--------|--------------|---------|-----------------|
| BA     | Domain | DG      | 70.5991 | 5.9089 | 1.2239       | 0.0010  | 67.9390 73.2593 |
| BA     | Domain | SG      | 75.1937 | 5.5335 | 1.2244       | 0.0010  | 72.7025 77.6848 |
| BA     | Domain | WB      | 91.7500 | 2.5812 | 1.2244       | 0.0010  | 90.5880 92.9120 |
| PPI    | Domain | DG      | 85.7778 | 4.5418 | 1.2244       | 0.0010  | 83.7331 87.8224 |
| PPI    | Domain | SG      | 83.6021 | 5.0934 | 1.2244       | 0.0010  | 81.3090 85.8951 |

|     |        |    |         |        |        |        |         |         |
|-----|--------|----|---------|--------|--------|--------|---------|---------|
| PPI | Domain | WB | 87.9257 | 3.8227 | 1.2244 | 0.0010 | 86.2047 | 89.6467 |
| BA  | Stage  | DG | 91.3703 | 2.0057 | 1.2245 | 0.0010 | 90.4674 | 92.2733 |
| BA  | Stage  | SG | 75.8919 | 2.8228 | 1.2242 | 0.0010 | 74.6210 | 77.1627 |
| BA  | Stage  | WB | 90.8931 | 2.3542 | 1.2245 | 0.0010 | 89.8333 | 91.9529 |
| PPI | Stage  | DG | 87.5856 | 3.1877 | 1.2244 | 0.0010 | 86.1505 | 89.0207 |
| PPI | Stage  | SG | 76.1367 | 3.5937 | 1.2244 | 0.0010 | 74.5188 | 77.7545 |
| PPI | Stage  | WB | 81.1832 | 2.3183 | 1.2244 | 0.0010 | 80.1395 | 82.2269 |

SUPPLEMENTARY TABLE 28

classification effect size compared to the permuted null effect over metrics (activation and connectivity) Factor and set. Empirical p is calculated as the number of null models that are better than the mean F1 of the true model.

**Decoding processing stages** demonstrate that information from any of the ROI sets and using either connectivity (Supplementary Figure 4 aiii) or activation (Supplementary Figure 4 aii) is sufficient to classify the processing stages with high accuracy compared to the null model (see Supplementary Table 33 for p-values); specifically, for activation ( $Acc_{WB} = 90.89$ ;  $Acc_{DG} = 91.37$ ;  $Acc_{SG} = 75.89$ ) and connectivity ( $Acc_{WB} = 81.18$ ;  $Acc_{DG} = 87.6$ ;  $Acc_{SG} = 76.14$ ).

| Source | SS         | df | MS        | Chi sq | Prob Chi sq | etaSquared |
|--------|------------|----|-----------|--------|-------------|------------|
| Groups | 2587.2667  | 1  | 2587.2667 | 8.4829 | 0.0036      | 0.1438     |
| Error  | 15407.7334 | 58 | 265.6506  | NaN    | NaN         | 0.0000     |
| Total  | 17995.0000 | 59 | NaN       | NaN    | NaN         | 0.0000     |

SUPPLEMENTARY TABLE 29

Kruskal Wallis non-parametric (distribution free) test comparing classification accuracy distance from null between activation and connectivity across sets for decoding Stage (meanRank<sub>Activity</sub>=37.07, meanRank<sub>Connectivity</sub>=23.93)

| Group1 | Group2 | N  | rankMean1 | rankMean2 | Z       | p value | Effect Size | Set |
|--------|--------|----|-----------|-----------|---------|---------|-------------|-----|
| BA     | PPI    | 10 | 15.5000   | 5.5000    | 3.7419  | 0.0002  | 1.1833      | DG  |
| BA     | PPI    | 10 | 10.2000   | 10.8000   | -0.1889 | 0.8502  | -0.0597     | SG  |
| BA     | PPI    | 10 | 15.5000   | 5.5000    | 3.7419  | 0.0002  | 1.1833      | WB  |

SUPPLEMENTARY TABLE 30

Post-hoc rank-sum Multicomparison across ROI sets

**Decoding visual domains**, the hierarchical clustering showed very weak dissociations between the WM domains. Therefore, the question arises as to how accurately they could be decoded based on the activity or connectivity from different ROI-sets (WB, DG and SG sets). Unexpectedly, visual domains also had high classification performance when applying a 3-way classifier for activation ( $Acc_{WB} = 91.75$ ;  $F_{1_{DG}} = 70.6$ ;  $F_{1_{SG}} = 75.2$ ) and connectivity ( $Acc_{WB} = 87.9$ ;  $F_{1_{DG}} = 85.8$ ;  $F_{1_{SG}} = 83.6$ ).

| Source | SS         | df | MS        | Chi sq | Prob Chi sq | etaSquared |
|--------|------------|----|-----------|--------|-------------|------------|
| Groups | 1440.6000  | 1  | 1440.6000 | 4.7233 | 0.0298      | 0.0801     |
| Error  | 16554.4000 | 58 | 285.4207  | NaN    | NaN         | 0.0000     |
| Total  | 17995.0000 | 59 | NaN       | NaN    | NaN         | 0.0000     |

SUPPLEMENTARY TABLE 31

Kruskal Wallis non-parametric (distribution free) test comparing classification accuracy distance from null between activation and connectivity across sets for decoding Domain (meanRank<sub>Activity</sub>=25.60, meanRank<sub>Connectivity</sub>=35.40)

| Group1 | Group2 | N  | rankMean1 | rankMean2 | Z       | p value | Effect Size | Set |
|--------|--------|----|-----------|-----------|---------|---------|-------------|-----|
| BA     | PPI    | 10 | 5.5000    | 15.5000   | -3.7418 | 0.0002  | -1.1832     | DG  |
| BA     | PPI    | 10 | 5.8000    | 15.2000   | -3.5150 | 0.0005  | -1.1115     | SG  |
| BA     | PPI    | 10 | 15.5000   | 5.5000    | 3.7419  | 0.0002  | 1.1833      | WB  |

SUPPLEMENTARY TABLE 32

Post-hoc rank-sum Multicomparison across ROI sets

#### 4.1 INCREASED ACCURACY OF DOMAIN DECODING AT HIGHER WM LOAD

One possibility, is that as WM demands increase, more "domain general" resources are brought on line. Based on this, one would predict that the classification accuracy will decrease as a function of demand as the level of similarity between activation or connectivity patterns increases. Alternatively, it could be the case that as WM demands increase the brain becomes more finely tuned towards a specialised connectivity state. To test between these alternative possibilities, the classifiers were applied to the single trial data (i.e. load x domain x run x repeat = 1026 events for study 1 and load x manipulation x domain x run x repeat = 768 events for study 2) and compared the performance distributions across loads. We start by showing that even within the resolution of a single trial classification accuracy is high.

| set | metric | GroupCount | Null    | oob     | CV      | Test    |
|-----|--------|------------|---------|---------|---------|---------|
| DG  | BA     | 1000       | 32.4058 | 72.1050 | 63.3777 | 62.4380 |
| DG  | PPI    | 1000       | 33.1616 | 76.2719 | 70.9536 | 66.1574 |
| SG  | BA     | 1000       | 32.9017 | 60.6104 | 57.3387 | 66.5490 |
| SG  | PPI    | 1000       | 32.9434 | 65.9535 | 57.7596 | 65.8313 |
| WB  | BA     | 1000       | 33.2587 | 79.8089 | 69.2018 | 72.6093 |
| WB  | PPI    | 1000       | 33.0120 | 79.3392 | 73.8061 | 75.7230 |

SUPPLEMENTARY TABLE 33

Mean performance of different classification models (metric and set)

| Metric | ROI set | mean F1 | std F1 | MannWhitneyR | p value | CI              |
|--------|---------|---------|--------|--------------|---------|-----------------|
| BA     | DG      | 62.4380 | 2.5280 | 1.2244       | 0.0010  | 61.2999 63.5761 |
| BA     | SG      | 66.5490 | 3.8565 | 1.2243       | 0.0010  | 64.8128 68.2852 |
| BA     | WB      | 72.6093 | 2.2833 | 1.2244       | 0.0010  | 71.5814 73.6373 |
| PPI    | DG      | 66.1574 | 2.5746 | 1.2244       | 0.0010  | 64.9984 67.3165 |
| PPI    | SG      | 65.8313 | 2.5511 | 1.2244       | 0.0010  | 64.6828 66.9798 |
| PPI    | WB      | 75.7230 | 1.8086 | 1.2244       | 0.0010  | 74.9087 76.5372 |

SUPPLEMENTARY TABLE 34

Classification effect size compared to the permuted null effect over metrics (activation and connectivity) and set. Empirical p is calculated as the number of null models that are better than the mean F1score of the true model.

We then show that classification is substantially better for both medium and high compared to low load, regardless of measure (activity or connectivity), or study.

| Source | SS         | df | MS        | Chi sq  | Prob Chi sq | etaSquared |
|--------|------------|----|-----------|---------|-------------|------------|
| Groups | 15809.2667 | 2  | 7904.6334 | 23.1638 | 0.0001      | 0.2603     |
| Error  | 44933.2334 | 87 | 516.4740  | NaN     | NaN         | 0.0000     |
| Total  | 60742.5000 | 89 | NaN       | NaN     | NaN         | 0.0000     |

**SUPPLEMENTARY TABLE 35**

Kruskal Wallis non-parametric (distribution free) test comparing classification accuracy distance from null across ROI sets for decoding Activity across loads (meanRank<sub>low</sub>=26.77, meanRank<sub>med</sub>=55.40, meanRank<sub>high</sub>=54.33).

| Group1 | Group2 | lower limit | mean diff | upper limit | p value |
|--------|--------|-------------|-----------|-------------|---------|
| low    | med    | -44.7816    | -28.6333  | -12.4850    | 0.0001  |
| low    | high   | -43.7149    | -27.5666  | -11.4183    | 0.0002  |
| med    | high   | -15.0816    | 1.0667    | 17.2150     | 1.0000  |

**SUPPLEMENTARY TABLE 36**

Post-hoc test Bonferroni corrected for multicomparison

| Source | SS         | df | MS         | Chi sq  | Prob Chi sq | etaSquared |
|--------|------------|----|------------|---------|-------------|------------|
| Groups | 28343.4667 | 2  | 14171.7334 | 41.5289 | 0.0001      | 0.4666     |
| Error  | 32399.0334 | 87 | 372.4027   | NaN     | NaN         | 0.0000     |
| Total  | 60742.5000 | 89 | NaN        | NaN     | NaN         | 0.0000     |

**SUPPLEMENTARY TABLE 37**

Kruskal Wallis non-parametric (distribution free) test comparing classification accuracy distance from null across ROI sets for decoding Connectivity across loads (meanRank<sub>low</sub>=20.70, meanRank<sub>med</sub>=54.57, meanRank<sub>high</sub>=61.23)

| Group1 | Group2 | lower limit | mean diff | upper limit | p value |
|--------|--------|-------------|-----------|-------------|---------|
| low    | med    | -50.0149    | -33.8666  | -17.7183    | 0.0001  |
| low    | high   | -56.6816    | -40.5333  | -24.3850    | 0.0001  |
| med    | high   | -22.8149    | -6.6666   | 9.4817      | 0.9690  |

**SUPPLEMENTARY TABLE 38**

Post-hoc test Bonferroni corrected for multicomparison

Similar inspection was performed for study 2 using Wilcoxon rank sum test replicating study 1 results, showing a small effect for activation ( $Z = -2.1363$ ,  $p < 0.05$ ,  $r = -0.39$ ), and more than double effect for connectivity ( $Z = -4.9897$ ,  $p < 0.0001$ ,  $r = -0.9109$ ).

| Group1 | Group2 | N  | rankMean1 | rankMean2 | Z       | p value | Effect Size |
|--------|--------|----|-----------|-----------|---------|---------|-------------|
| Low    | High   | 30 | 25.6667   | 35.3334   | -2.1363 | 0.0327  | -0.39       |

**SUPPLEMENTARY TABLE 39**

Wilcoxon rank sum non-parametric (distribution free) test comparing low and high classification accuracy distance from null for decoding visual domains using Activity (meanRank<sub>low</sub>=25.67, meanRank<sub>high</sub>=35.33)



| Group1 | Group2 | N  | rankMean1 | rankMean2 | Z       | p value | Effect Size |
|--------|--------|----|-----------|-----------|---------|---------|-------------|
| Low    | High   | 30 | 19.2334   | 41.7667   | -4.9897 | 0.0001  | -0.9109     |

SUPPLEMENTARY TABLE 40

Wilcoxon rank sum non-parametric (distribution free) test comparing low and high classification accuracy distance from null for decoding visual domains using Connectivity (meanRank<sub>low</sub>=19.23, meanRank<sub>high</sub>=41.77)

## 4.2 DECODING VISUAL DOMAINS ACROSS PROCESSING STAGES

A pertinent question is whether the existing domain specific pattern is sustained across processing stages. To test this, we produced a stack of observations containing subject x domain x stages x run events for each study (Study1;19x3x3x3 = 513, Study2;16x2x3x3 = 288) and used the same cross-study approach as above to assess the model's performance. Separating events by stage resulted in a substantial reduction in performance; nonetheless, all models had high accuracy compared to the null (see Supplementary Table 48,49); specifically, for activation ( $F_{1_{WB}} = 80.9$ ;  $F_{1_{DG}} = 69.6$ ;  $F_{1_{SG}} = 74.2$ ) and connectivity ( $F_{1_{WB}} = 82.46$ ;  $F_{1_{DG}} = 76.39$ ;  $F_{1_{SG}} = 74.48$ ). These results suggest that there are persistent regional activity and connectivity patterns that encode for WM domains consistently across the different stages of a trial.

| set | metric | GroupCount | Null    | oob     | CV      | Test    |
|-----|--------|------------|---------|---------|---------|---------|
| DG  | BA     | 1000       | 30.7761 | 73.7856 | 66.7149 | 69.6238 |
| DG  | PPI    | 1000       | 33.5074 | 82.9559 | 73.9340 | 76.3889 |
| SG  | BA     | 1000       | 32.0249 | 62.4015 | 56.1749 | 74.2017 |
| SG  | PPI    | 1000       | 32.8793 | 73.5609 | 64.3746 | 74.4846 |
| WB  | BA     | 1000       | 33.4217 | 82.4025 | 70.7629 | 80.8845 |
| WB  | PPI    | 1000       | 32.5735 | 84.6021 | 76.6661 | 82.4605 |

SUPPLEMENTARY TABLE 41

Mean performance of different classification models

| Metric | ROI set | mean F1 | std F1 | MannWhitneyR | p value | CI              |
|--------|---------|---------|--------|--------------|---------|-----------------|
| BA     | DG      | 69.6238 | 3.5442 | 1.2244       | 0.0010  | 68.0282 71.2194 |
| BA     | SG      | 74.2017 | 3.7237 | 1.2244       | 0.0010  | 72.5253 75.8781 |
| BA     | WB      | 80.8845 | 3.2431 | 1.2244       | 0.0010  | 79.4245 82.3446 |
| PPI    | DG      | 76.3889 | 2.9659 | 1.2244       | 0.0010  | 75.0536 77.7241 |
| PPI    | SG      | 74.4846 | 2.8460 | 1.2244       | 0.0010  | 73.2034 75.7659 |
| PPI    | WB      | 82.4605 | 2.4110 | 1.2244       | 0.0010  | 81.3751 83.5459 |

SUPPLEMENTARY TABLE 42

classification effect size compared to the permuted null effect over metrics (activation and connectivity) and set. Empirical p is calculated as the number of null models that are better than the mean F1 of the true model.

### 4.3 STAGE AND DOMAIN SPECIFICITY

Our results suggest the existence of a generalized domain specific states across stages, however, it is plausible to assume that the nature of these states is dynamic and thus is affected by processing stage demands. In other words, can we find evidence supporting secondary domain specific states that are stage specific? To test this, we trained independent domain classification models for each stage from the stack above. We then estimated two measures 1) match distance estimating accuracy improvement for same stage events between global and stage specific models. and 2) mismatch distance estimating accuracy decline for mismatched stage events (see methods for details).

Comparing stage specific models (i.e. trained on a specific stage) performance to global models (i.e. trained using events from all stages), it was apparent that in general the global models outperformed the specific models for both the match and mismatch cases. This wasn't the case for both DG and SG connectivity models where a strong improvement was seen for the specific models. Notably, in all models, as expected Match metric outperformed Mismatch, suggesting the existence of subtle patterns that differentiate between domains and are stage-specific.

| Metric | Set | CohenD | P    | MeanA | MeanB | Specificity | df    | t      |
|--------|-----|--------|------|-------|-------|-------------|-------|--------|
| BA     | WB  | -1.04  | 0.03 | 78.74 | 80.69 | Match       | 18.00 | -2.33  |
| BA     | WB  | -3.85  | 0.00 | 66.32 | 80.69 | Mismatch    | 18.00 | -8.61  |
| BA     | WB  | 3.32   | 0.00 | 78.74 | 66.32 | MatchVsMis  | 18.00 | 7.42   |
| BA     | DG  | -1.71  | 0.00 | 65.82 | 69.05 | Match       | 18.00 | -3.82  |
| BA     | DG  | -5.99  | 0.00 | 58.64 | 69.05 | Mismatch    | 18.00 | -13.39 |
| BA     | DG  | 4.30   | 0.00 | 65.82 | 58.64 | MatchVsMis  | 18.00 | 9.61   |
| BA     | SG  | -4.52  | 0.00 | 65.75 | 74.08 | Match       | 18.00 | -10.10 |
| BA     | SG  | -6.35  | 0.00 | 60.33 | 74.08 | Mismatch    | 18.00 | -14.19 |
| BA     | SG  | 2.35   | 0.00 | 65.75 | 60.33 | MatchVsMis  | 18.00 | 5.26   |
| PPI    | WB  | -4.96  | 0.00 | 77.15 | 82.41 | Match       | 18.00 | -11.09 |
| PPI    | WB  | -17.08 | 0.00 | 56.35 | 82.41 | Mismatch    | 18.00 | -38.20 |
| PPI    | WB  | 13.65  | 0.00 | 77.15 | 56.35 | MatchVsMis  | 18.00 | 30.51  |
| PPI    | DG  | 2.74   | 0.00 | 79.35 | 76.08 | Match       | 18.00 | 6.14   |
| PPI    | DG  | -14.53 | 0.00 | 47.56 | 76.08 | Mismatch    | 18.00 | -32.49 |
| PPI    | DG  | 17.17  | 0.00 | 79.35 | 47.56 | MatchVsMis  | 18.00 | 38.40  |
| PPI    | SG  | 3.14   | 0.00 | 78.16 | 74.02 | Match       | 18.00 | 7.02   |
| PPI    | SG  | -6.54  | 0.00 | 63.29 | 74.02 | Mismatch    | 18.00 | -14.61 |
| PPI    | SG  | 8.00   | 0.00 | 78.16 | 63.29 | MatchVsMis  | 18.00 | 17.88  |

SUPPLEMENTARY TABLE 43

Comparing Match & Mismatch to each other as well as the global model's performance using 2-way t-test revealed that across domains both stage specific and stage general patterns code for different aspects of WM domains.

#### 4.4 DECODING MANIPULATION VS MAINTAIN

| set | factor       | metric | GroupCount | Null    | oob     | CV      |
|-----|--------------|--------|------------|---------|---------|---------|
| DG  | mainpulation | BA     | 1000       | 48.0019 | 37.9816 | 45.3055 |
| DG  | mainpulation | PPI    | 1000       | 47.6420 | 43.4682 | 49.0877 |
| SG  | mainpulation | BA     | 1000       | 48.0942 | 42.4013 | 49.3940 |
| SG  | mainpulation | PPI    | 1000       | 47.7101 | 41.7191 | 46.0078 |
| WB  | mainpulation | BA     | 1000       | 48.4354 | 33.4835 | 43.4735 |
| WB  | mainpulation | PPI    | 1000       | 47.1568 | 37.3194 | 44.7021 |

SUPPLEMENTARY TABLE 44

Mean performance of different classification models for the manipulation factor on study 2

| Metric | ROI set | mean F1 | std F1 | MannWhitneyR | p value | CI              |
|--------|---------|---------|--------|--------------|---------|-----------------|
| BA     | DG      | 45.3055 | 7.4396 | -0.2250      | 0.6184  | 41.9562 48.6547 |
| BA     | SG      | 49.3940 | 7.9305 | 0.1079       | 0.4525  | 45.8237 52.9642 |
| BA     | WB      | 43.4735 | 8.4875 | -0.3845      | 0.6943  | 39.6524 47.2945 |
| PPI    | DG      | 49.0877 | 7.8940 | 0.1288       | 0.4246  | 45.5339 52.6415 |
| PPI    | SG      | 46.0078 | 9.4681 | -0.1334      | 0.5784  | 41.7453 50.2702 |
| PPI    | WB      | 44.7021 | 7.7989 | -0.1944      | 0.5964  | 41.1911 48.2131 |

SUPPLEMENTARY TABLE 45

classification effect size compared to the permuted null effect over metrics (activation and connectivity) Factor and set. Empirical p is calculated as the number of null models that are better than the mean F1 score of the true model.
